# 1 **A mesoderm-independent role for Nodal signaling in convergence & extension gastrulation** 2 **movements**

3  
4 Margot L.K. Williams\* and Lilianna Solnica-Krezel

5  
6 Washington University School of Medicine Department of Developmental Biology, St. Louis, MO

7 \* Author for correspondence: [williamsma@wustl.edu](mailto:williamsma@wustl.edu)

8

## 9 **ABSTRACT**

10 During embryogenesis, the distinct morphogenetic cell behavior programs that shape tissues are influenced  
11 both by the fate of cells and their position with respect to the embryonic axes, making embryonic patterning a  
12 prerequisite for morphogenesis. These two essential processes must therefore be coordinated in space and  
13 time to ensure proper development, but mechanisms by which patterning information is translated to the  
14 cellular machinery that drives morphogenesis remain poorly understood. Here, we address the role of Nodal  
15 morphogen signaling at the intersection of cell fate specification, patterning, and anteroposterior (AP) axis  
16 extension in zebrafish gastrulae and embryonic explants. AP axis extension is impaired in Nodal-deficient  
17 embryos, but it is unclear whether this defect is strictly secondary to their severe mesendoderm deficiencies or  
18 also results from loss of Nodal signaling *per se*. We find that convergence & extension (C&E) gastrulation  
19 movements and underlying mediolateral (ML) cell polarization are reduced in the neuroectoderm of Nodal-  
20 deficient mutants and exacerbated by simultaneous disruption of Planar Cell Polarity (PCP) signaling,  
21 demonstrating at least partially parallel functions of Nodal and PCP. ML polarity of mutant neuroectoderm cells  
22 is not fully restored upon transplantation into wild-type gastrulae, demonstrating a cell autonomous,  
23 mesoderm-independent role for Nodal in neural cell polarization. This is further demonstrated by the ability of  
24 Nodal ligands to promote neuroectoderm-driven C&E of naïve blastoderm explants in a tissue-autonomous  
25 fashion. Finally, temporal manipulation of signaling reveals that Nodal contributes to neural C&E in explants  
26 after mesoderm is specified and promotes C&E even in the absence of mesoderm. Together these results  
27 reveal a mesoderm-independent, cell-autonomous role for Nodal signaling in neural C&E that may cooperate  
28 with previously-described mesoderm-dependent mechanisms to drive AP embryonic axis extension.

29

## 30 **INTRODUCTION**

31 The embryonic body plan first emerges during gastrulation, the early developmental process during which the  
32 three primordial germ layers- ectoderm, mesoderm, and endoderm- are formed and embryonic axes are  
33 manifest. The anteroposterior (AP) body axis undergoes dramatic extension at this time, a process that is  
34 essential for proper body plan formation and neural tube closure (Davidson & Keller, 1999; Wallingford &  
35 Harland, 2002). Axial extension results from highly conserved convergence & extension (C&E) movements that  
36 simultaneously elongate tissues along the AP and narrow them in the mediolateral (ML) dimension (Keller &  
37 Danilchik, 1988; Keller et al., 2000; Warga & Kimmel, 1990). This process is driven in vertebrate embryos by a

1 combination of highly polarized cell behaviors, including mediolateral intercalation behavior (MIB) and directed  
2 migration (Keller et al., 2000; Warga & Kimmel, 1990). MIB describes the ML alignment and elongation of cells  
3 and the acquisition of bipolar protrusive behavior by which cells intercalate in a polarized fashion between their  
4 anterior and posterior neighbors (Shih & Keller, 1992a, 1992b). In vertebrate embryos, this ML polarization of  
5 cells and their behaviors is regulated by Planar Cell Polarity (PCP) signaling (Heisenberg et al., 2000; Jessen  
6 et al., 2002; Kilian et al., 2003; Park & Moon, 2002; Tada & Smith, 2000; Topczewski et al., 2001; Wallingford  
7 et al., 2000; J. Wang et al., 2006; Wang, Guo, & Nathans, 2006; Ybot-Gonzalez et al., 2007). First discovered  
8 in *Drosophila*, this conserved signaling network is required for collective polarity across cellular fields, within  
9 the plane of a tissue (Strutt & Strutt, 2005; Vinson & Adler, 1987). Core PCP components acquire asymmetric  
10 distribution within cells (Bastock et al., 2003), with some becoming enriched at the anterior or posterior aspects  
11 of vertebrate cells as they undergo gastrulation movements (Bastock, Strutt, & Strutt, 2003; Ciruna, Jenny,  
12 Lee, Mlodzik, & Schier, 2006; Roszko, S Sepich, Jessen, Chandrasekhar, & Solnica-Krezel, 2015; Y. Wang et  
13 al., 2006; Yin, Ciruna, & Solnica-Krezel, 2009). Because impairment of PCP signaling in vertebrate embryos  
14 dramatically disrupts axis extension but has little effect on patterning, it is thought to act as a molecular  
15 compass that allows cells to sense and/or respond to positional cues within the embryos (Gray, Roszko, &  
16 Solnica-Krezel, 2011; Yin et al., 2009). This implies the existence of a molecular mechanism by which  
17 patterning information is communicated to this compass, and ultimately to the cellular machinery that drives  
18 C&E cell behaviors.

19 In contrast with vertebrate embryos, PCP is not required for axial extension in *Drosophila*, which  
20 instead requires AP patterning conferred by the striped expression of pair-ruled genes (Irvine & Wieschaus,  
21 1994; Zallen & Wieschaus, 2004). These in turn regulate the expression of Toll-like receptors in a partially  
22 overlapping striped pattern, thereby comprising a positional code along the extending AP axis (Paré et al.,  
23 2014). AP patterning is similarly required for extension of the gut tube in *Drosophila* and *Xenopus*, and during  
24 *Xenopus* gastrulation (Johansen, Iwaki, & Lengyel, 2003; Li et al., 2008; Ninomiya, Elinson, & Winklbauer,  
25 2004). In particular, Ninomaya et al. (2004) reported that *Xenopus* explants with different AP positional  
26 identities extend when apposed *ex vivo*, whereas those with the same positional identity do not. Notably, these  
27 positional identities could be recapitulated by different doses of the TGF $\beta$  ligand Activin (Ninomiya et al., 2004),  
28 which signals largely via the Nodal signaling pathway (Pauklin & Vallier, 2015). These results demonstrate that  
29 patterning of the AP axis is required for axial extension, and implies a crucial role for Nodal signaling at this  
30 intersection of tissue patterning and morphogenesis.

31 Nodal is a TGF $\beta$ -superfamily morphogen whose graded signaling within the embryo produces discrete  
32 developmental outcomes depending on a cell's position within that gradient and the resulting signaling  
33 level/duration to which it is exposed (Chen & Schier, 2001; Dubrulle et al., 2015; Dyson & Gurdon, 1998;  
34 Gurdon et al., 1999; van Boxtel et al., 2015). Upon binding of Nodal-Gdf3 (Vg1) heterodimers (Bisgrove, Su, &  
35 Yost, 2017; Montague & Schier, 2017; Pelliccia, Jindal, & Burdine, 2017), the receptor complex - comprised of  
36 two each of the Type I and Type II serine-threonine kinase receptors Acvr1b and Acvr2b and the co-receptor  
37 Tdgr - is activated and phosphorylates the downstream transcriptional effectors Smad2 and/or Smad3

1 (Gritsman et al., 1999; Schier & Shen, 2000). Nodal signaling is essential for specification of endoderm and  
2 mesoderm germ layers and patterning tissues along the AP axis, with the highest signaling levels producing  
3 endoderm and the most dorsal/anterior mesoderm fates (Dougan, Warga, Kane, Schier, & Talbot, 2003;  
4 Feldman, Dougan, Schier, & Talbot, 2000; Feldman et al., 1998; Gritsman, Talbot, & Schier, 2000; B. Thisse,  
5 Wright, & Thisse, 2000; Vincent, Dunn, Hayashi, Norris, & Robertson, 2003). Mouse embryos mutant for Nodal  
6 signaling components fail to gastrulate (Conlon et al., 1994), and Nodal-deficient zebrafish exhibit a complete  
7 lack of endoderm and severe mesoderm deficiencies (Dubrulle et al., 2015; Feldman et al., 1998; Gritsman et  
8 al., 1999), as well as neural tube closure and axis extension defects (Aquilina-Beck, Ilagan, Liu, & Liang, 2007;  
9 Gonsar et al., 2016).

10 Restoration of mesoderm to maternal-zygotic *one-eyed pinhead* (M $Zoep$ ) mutant embryos, which lack  
11 the essential Tdgf Nodal co-receptor (Gritsman et al., 1999), improves both axis length and neural tube  
12 morphology (Araya et al., 2014), strongly implying that axis extension defects in these mutants is secondary to  
13 their lack of mesoderm. Similarly, the degree of mesoderm deficiency in Nodal signaling mutants is correlated  
14 with the severity of neural tube defects (Aquilina-Beck et al., 2007; Gonsar et al., 2016). Furthermore, friction  
15 forces between anterior axial mesoderm and the overlying neuroectoderm promote axis extension (Smutny et  
16 al., 2017), again implying that Nodal regulates morphogenesis indirectly via mesoderm specification. However,  
17 the presence of mesoderm is not sufficient for C&E to occur, as demonstrated in *Xenopus* animal cap explants  
18 (Howard & Smith, 1993; Ninomiya et al., 2004). Instead, Activin signaling must be graded to drive extension  
19 (Ninomiya et al., 2004), implying an instructive rather than (or in addition to) a permissive role. Indeed,  
20 knockdown of two out of six *Xenopus* Nodal ligands disrupts C&E without affecting mesoderm formation  
21 (Luxardi, Marchal, Thomé, & Kodjabachian, 2010), implying a more direct role in morphogenesis. It is not  
22 known, however, whether or how Nodal regulates C&E of non-mesodermal tissues.

23 Here, we investigated the role of Nodal signaling in C&E gastrulation movements in zebrafish. We  
24 demonstrate that defective C&E movements in the neuroectoderm of M $Zoep$  mutant gastrulae are associated  
25 with reduced ML cell alignment and protrusive activity. Transplantation of mutant neuroectoderm cells into wild-  
26 type (WT) gastrulae did not fully restore their ML polarity, implying a mesoderm-independent role for Nodal in  
27 cell polarization. Surprisingly, M $Zoep$ <sup>-/-</sup> neuroectoderm cells exhibited normal, anteriorly-biased localization of  
28 Prickle-GFP, a hallmark of PCP polarity. Moreover, C&E in M $Zoep$  mutants was reduced further by  
29 interference with the core PCP component Vangl2, demonstrating that Nodal regulates C&E cell behaviors at  
30 least partially in parallel with PCP. To further examine this cell-autonomous function of Nodal signaling in  
31 morphogenesis, we employed blastoderm explantation to isolate the effects of Nodal from endogenous  
32 signaling centers of intact embryos. We found that, as in *Xenopus* animal cap assays, expression of Nodal  
33 ligands is sufficient for robust extension of naïve zebrafish blastoderm explants in culture. Intriguingly, although  
34 these explants contain all three germ layers, their extension is driven predominantly by neuroectoderm. By  
35 combining explanted WT mesoderm with M $Zoep$  mutant neuroectoderm, we find that Nodal signaling is  
36 required tissue-autonomously within the neuroectoderm for its extension *ex vivo*. Finally, treatment with Nodal  
37 inhibitors defined a late phase of signaling that promotes C&E of neuroectoderm-containing explants in the

1 absence of mesoderm. Together, these data support a model in which Nodal signaling cooperates with PCP to  
2 promote C&E and axial extension through a combination of mesoderm-dependent and -independent  
3 mechanisms.

4

## 5 RESULTS

### 6 ***Nodal regulates C&E cell behaviors cell autonomously and non-autonomously***

7 Zebrafish embryos double mutant for the two *nodal*-related genes expressed during gastrulation, *ndr1* (*sqt*)  
8 and *ndr2* (*cyc*), or lacking both maternal and zygotic function of the co-receptor Tdgf (*MZoep*) or the  
9 downstream effector Smad2, exhibit severe mesendoderm deficiencies and impaired AP extension of the  
10 remaining neuroectoderm (Dubrulle et al., 2015; Feldman et al., 1998; Gritsman et al., 1999) (Figure 1A).  
11 However, underlying cell behavior defects during gastrulation have not been characterized. We therefore  
12 analyzed cell movements in the dorsal region of WT and *MZoep* mutants by time-lapse confocal microscopy  
13 for a period of three hours beginning shortly after the onset of C&E movements (80% epiboly, 8.5 hours post-  
14 fertilization (hpf)). Automated tracking of fluorescently-labeled nuclei in WT gastrulae revealed clear  
15 convergence of cells from lateral positions toward the dorsal midline and concomitant extension along the AP  
16 axis (Figure 1B-C, top). Color-coding of cell tracks according to their velocities revealed that rates of cell  
17 movement are highest in the lateral-, anterior-, and posterior-most regions of the gastrula and lowest in the  
18 center (Figure 1D, top). This is consistent with mediolateral intercalation, which is characterized by a stationary  
19 point near the embryo's equator and cell velocities that increase proportionally with their distance from this  
20 point (Concha & Adams, 1998; Glickman, Kimmel, Jones, & Adams, 2003). By contrast, *MZoep* mutants  
21 exhibited disorganized movement and velocity patterns inconsistent with ML intercalation (Figure 1B-D,  
22 bottom). These cells moved along swirling paths rather than the direct anterior- and medial-ward movement of  
23 WT cells and were seen crossing the dorsal midline, which is not observed in WT embryos (Figure 1B)(Concha  
24 & Adams, 1998). Migration speed and track displacement were also significantly reduced in *MZoep* mutants  
25 compared with WT gastrulae (Figure 1F), similar to results reported from slightly later developmental stages  
26 (Araya et al., 2014).

27 We next used a fluorescent membrane marker to assess ML cell alignment and protrusive activity  
28 underlying C&E in the neuroectoderm of WT and *MZoep*<sup>-/-</sup> embryos from 8.5 hpf until the end of gastrulation  
29 (10 hpf) (Figure 1E,H-J). Cell alignment was measured as the orientation of each major cell axis with respect to  
30 the embryo's ML axis, with 0° being perfectly ML-oriented. Unlike the marked ML alignment of WT cells that  
31 increased over time (Figure 1G, blue dots), *MZoep*<sup>-/-</sup> cells were significantly less well aligned at both 8.5 and  
32 10 hpf time points (Figure 1G, maroon dots) ( $p < 0.0001$ , Kolmogorov-Smirnov test). We then measured the  
33 orientation of cellular protrusions within the neuroectoderm of WT and *MZoep*<sup>-/-</sup> gastrulae using cell  
34 transplantation to achieve sparse cell labeling. Protrusions made by WT cells exhibited a strong ML bias typical  
35 of MIB (Figure 1H)(Keller et al., 2000), whereas protrusions of *MZoep*<sup>-/-</sup> cells were essentially randomly  
36 oriented with a slight anterior bias (Figure 1J). Together, these results demonstrate a severe disruption of C&E  
37 gastrulation movements and polarized cell behaviors in *MZoep* mutants.

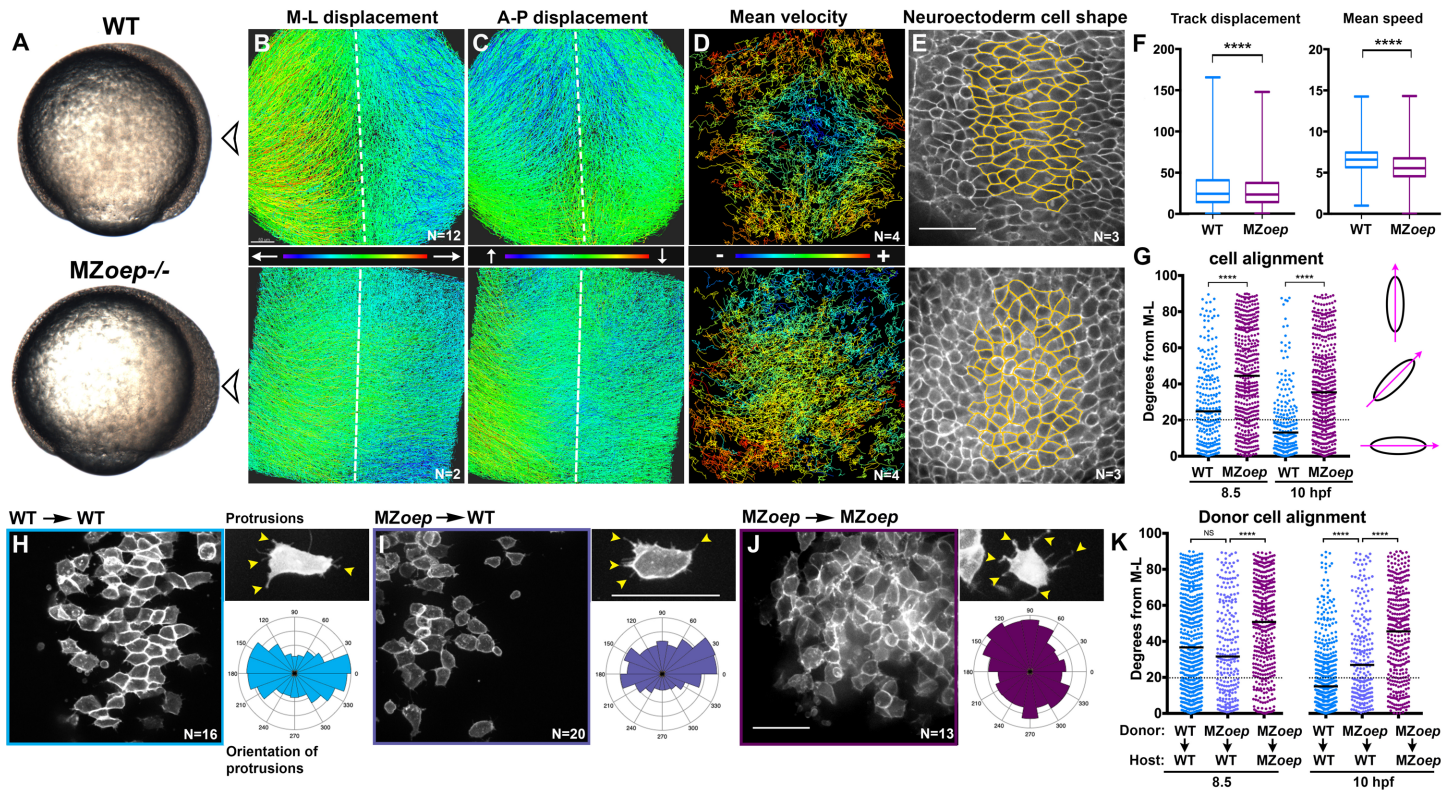

**Figure 1: Nodal signaling regulates convergence & extension cell behaviors**

**A**) Bright field images of live WT and MZoep<sup>-/-</sup> embryos at 80% epiboly (8.5 hpf). Arrowhead indicates the point-of-view (dorsal side) from which all fluorescent confocal micrographs were taken. **B-D**) Representative images of automated tracking of fluorescently labeled nuclei in the dorsal hemisphere of WT (top) and MZoep<sup>-/-</sup> (bottom) gastrulae. Tracks represent cell movements over three hours of time-lapse confocal imaging beginning at 8.5 hpf and are colored according to their displacement in the mediolateral (B) and anteroposterior (C) dimensions or mean velocity of cell movement (D). Dotted lines indicate dorsal midline. **E**) Representative images of membrane-labeled neuroectoderm in live WT (top) and MZoep<sup>-/-</sup> (bottom) gastrulae with cells outlined in yellow. **F**) Mean speed and track displacement of labeled nuclei in WT and MZoep<sup>-/-</sup> gastrulae tracked over three hours beginning at 8.5 hpf. Box plots represent the median and 25<sup>th</sup> - 75<sup>th</sup> quartiles, whiskers represent minimum and maximum values. N= 4 embryos of each genotype, p<0.0001, Kolmogorov-Smirnoff (K-S) tests. **G**) Neuroectoderm cell alignment at 8.5 hpf (left) and 10 hpf (right). Each dot represents a single cell, black bars are median values. N=3 embryos of each genotype, p<0.0001, K-S tests. **H-J**) Representative images of membrane-labeled donor cells within the neuroectoderm of unlabeled host gastrulae of the indicated genotypes. Right panels depict representative images (top) and orientation (bottom) of protrusions made by neuroectoderm cells of the genotypes/conditions indicated. Arrowheads indicate protrusions. Orientation of all protrusions made between 8.5 and 10 hpf is shown in radial histograms divided into 20° bins, with 0 and 180 representing ML. **K**) Donor cell alignment as in (G). The number of embryos in each condition is indicated on the corresponding panels in (H-J). Anterior is up in all images, scale bars are 50µm.

1  
2  
3  
4  
5  
6  
7  
8  
9  
10  
11  
12  
13  
14  
15  
16  
17  
18  
19  
20  
21  
22  
23  
24  
25

1 Previous studies have shown that axis extension can be largely rescued by restoration of mesoderm to  
2 MZ*oep* mutant embryos (Araya et al., 2014), but the autonomy of Nodal signaling within the neuroectoderm  
3 has not been examined at the level of cell polarity. To determine whether the presence of mesoderm improves  
4 ML polarity of MZ*oep* mutant neuroectoderm cells during gastrulation, we transplanted membrane-labeled  
5 MZ*oep*<sup>-/-</sup> cells into the neuroectoderm of WT hosts (Figure 1I). We found that the degree to which polarity was  
6 restored varied by developmental stage. At 8.5 hpf, the alignment of MZ*oep*<sup>-/-</sup> cells within WT hosts was not  
7 significantly different from WT donor cells in WT hosts, whereas at 10 hpf, MZ*oep*<sup>-/-</sup> donor cells were  
8 significantly less well aligned than WT controls (Figure 1K) ( $p < 0.0001$ , K-S test). Notably, mutant cells in WT  
9 host gastrulae were significantly better aligned than MZ*oep*<sup>-/-</sup> cells in MZ*oep*<sup>-/-</sup> hosts at both time points  
10 (Figure 1K) ( $p < 0.0001$ , K-S test). Orientation of MZ*oep*<sup>-/-</sup> cellular protrusions was also partially improved within  
11 WT hosts, although they failed to achieve the clear bipolarity of WT protrusions (Figure 1I). These results  
12 reveal two phases of neuroectoderm cell polarization: an initial period during which Nodal-deficient cells  
13 polarize normally in a WT environment, and an additional later phase when Nodal is required cell-  
14 autonomously for full ML polarity. Together these results reveal an essential role for Nodal signaling in  
15 neuroectoderm C&E, including a discrete mesoderm-independent phase of ML cell polarization.

16

### 17 ***Nodal functions partially in parallel with PCP signaling during axis extension***

18 Because PCP signaling is a critical regulator of ML cell polarization underlying C&E, we next assessed the  
19 activity and polarity of this signaling network within MZ*oep* mutant neuroectoderm. We first examined  
20 expression of PCP signaling components in MZ*oep* mutants by whole mount in situ hybridization (WISH) at  
21 late gastrulation. Expression of the Wnt/PCP ligand *wnt11* is a known direct transcriptional target of Nodal  
22 signaling (Dubrulle et al., 2015; Gritsman et al., 1999), but other PCP genes *wnt5b*, *vangl2* (*trilobite*), and *gpc4*  
23 (*knypek*) were all expressed robustly in MZ*oep*<sup>-/-</sup> gastrulae (Figure 2A). We next transplanted cells expressing  
24 a GFP-fusion of the core PCP component Prickle (Pk-GFP) into the neuroectoderm of host gastrulae and  
25 assessed localization of Pk-GFP to the anterior edge of neuroectoderm cells as a read-out of PCP signaling  
26 activity (Ciruna et al., 2006; Yin, Kiskowski, Pouille, Farge, & Solnica-Krezel, 2008). We found that WT donor  
27 cells in WT hosts and MZ*oep*<sup>-/-</sup> donor cells in MZ*oep*<sup>-/-</sup> hosts exhibited similar proportions of anteriorly-  
28 localized Pk-GFP puncta, although the latter contained significantly more membrane-associated puncta that  
29 were not anteriorly localized (chi-square,  $p = 0.0001$ ) (Figure 2B-C). Finally, we tested whether disrupting PCP  
30 signaling with an antisense morpholino oligonucleotide (MO) against *vangl2* (Williams et al., 2012) further  
31 reduced C&E in MZ*oep* mutant gastrulae. Upon injection with *vangl2* MO at a dose that phenocopies *trilobite*  
32 mutant C&E defects (Figure 2G)(Solnica-Krezel et al., 1996), the neural plates of both WT and MZ*oep* mutant  
33 embryos were significantly wider and shorter than in uninjected controls at late gastrulation (Figure 2D-F),  
34 indicating further C&E reduction. Because disrupted PCP signaling exacerbated C&E defects in embryos  
35 completely devoid of Nodal signaling, together with our data suggesting largely intact PCP signaling in MZ*oep*  
36 mutants, these results indicate that Nodal functions at least partially in parallel with PCP during C&E  
37 gastrulation movements.

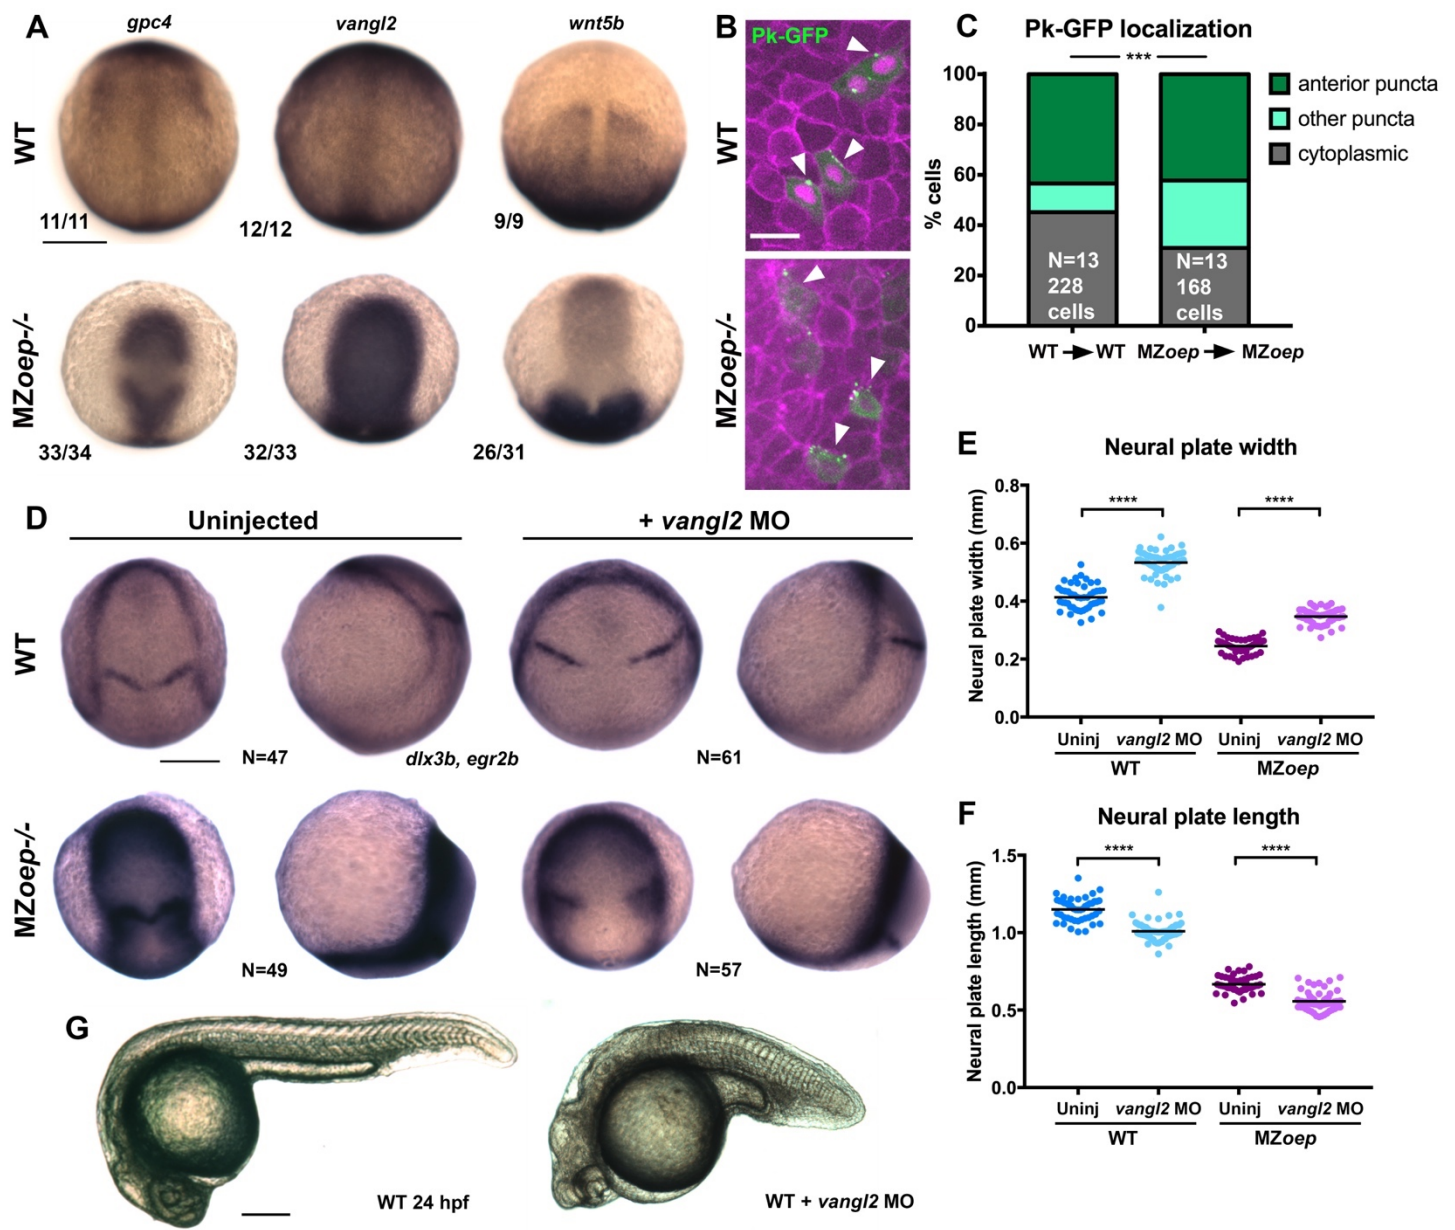

## Figure 2: Nodal regulates C&E at least partially in parallel with PCP signaling

**A**) In situ hybridization for the transcripts indicated in WT (top) and MZoep<sup>-/-</sup> (bottom) gastrulae at 9.5 hpf. Fractions indicate the number of embryos with the pictured phenotype over the number of embryos examined.

**B**) Representative images of transplanted Prickle (Pk)-GFP donor cells within the neuroectoderm of membrane-labeled WT and MZoep<sup>-/-</sup> host gastrulae. Arrowheads indicate puncta at anterior edges. **C**) Pk-GFP localization in the genotypes indicated. N indicates the number of embryos and cells analyzed for each condition,  $p < 0.001$ , Chi-square test.

**D**) In situ hybridization for *dlx3b* and *egr2b* in WT (top) and MZoep<sup>-/-</sup> (bottom) gastrulae at 9.5 hpf, uninjected or injected with 2ng MO4-*vangl2*. Dorsal views on the left, lateral views on the right. **E-F**) Width (E) and length (F) of neural plates in the embryos depicted in (D). Each dot represents a single embryo, black bars are mean values. Number of embryos in each condition is indicated on the corresponding panel in (D),  $p < 0.0001$ , Unpaired T-tests. **G**) Representative images of live WT embryos uninjected (left) or injected with 2ng MO4-*vangl2* (right) at 24 hpf. Anterior is up in (A-F), to the left in (G). Scale bars are 20 $\mu$ m in (B), 200 $\mu$ m in all other panels.

## 1 ***Nodal signaling promotes ex vivo extension and tissue patterning***

2 The results described above demonstrate that Nodal signaling is necessary for full polarization of cells and cell  
3 behaviors underlying C&E during gastrulation. To test whether Nodal is also sufficient for these behaviors, we  
4 sought to define its role during axis extension in relative isolation, independently of other signaling and  
5 patterning events within the embryo. To this end, we employed blastoderm explantation, a technique by which  
6 the animal region of blastula-stage zebrafish embryos is isolated from endogenous signaling centers at the  
7 embryonic margin to produce clusters of relatively naïve cells that can be grown and manipulated in culture  
8 (Sagerström, Grinblat, & Sive, 1996; Xu, Houssin, Ferri-Lagneau, Thisse, & Thisse, 2014). To determine the  
9 effect of Nodal signaling on such explants, we injected WT embryos at one-cell stage with a series of doses  
10 (from 2.5 to 100pg per embryo) of synthetic *ndr2* mRNA, explanted the animal portion of the blastoderm at  
11 256-512 cell stage (2.5 hpf), and cultured them *ex vivo* until intact siblings reached two to four somite (2-4S)  
12 stage (Figure 3A, Figure S3). Several of these doses induced robust extension of explants in culture, while  
13 explants cut from *GFP*-injected or uninjected WT control or *ndr2*-injected *MZoepl-* embryos failed to extend  
14 (Figure 3B-E, Figure S3).

15 We assessed explant extension by live time-lapse imaging and length/width ratio measurements of  
16 fixed explants at the equivalent of 2-4S stage. Time-lapse imaging of live *ndr2*-injected explants revealed the  
17 onset of extension morphogenesis at or around 8 hpf (Figure 3F), corresponding precisely with the start of  
18 C&E movements in intact embryos. While all *ndr2* doses induced some degree of extension over control  
19 explants, the intermediate doses (5-25pg) were most effective, with 10pg producing the most extension and  
20 the highest dose, 100pg, producing the least (Figure S3B). Because it produced the most robust extension,  
21 10pg *ndr2* was used for most subsequent experiments.

22 Whole mount *in situ* hybridization (WISH) revealed that explants expressed markers of endoderm,  
23 mesoderm (dorsal gastrula organizer, axial and paraxial), and neuroectoderm according to the dose of *ndr2*  
24 with which they were injected, consistent with Nodal-dependent tissue induction in intact embryos (Chen &  
25 Schier, 2001; Feldman et al., 2000; B. Thisse et al., 2000). For example, low doses of *ndr2* induced robust  
26 expression of the neuroectoderm marker *sox2* and some paraxial mesoderm (*tbx16*), whereas high doses  
27 induced expression of the endoderm marker *sox17* and the organizer gene *gsc*, but less neuroectoderm  
28 (Figure S3A). Uninjected control explants expressed none of these tissue-specific markers at appreciable  
29 levels. Notably, explants injected with 10pg *ndr2* exhibited discrete gene expression domains: mesoderm  
30 markers *tbxta*, *tbx16*, and *noto* were nearly always restricted to one end, *sox17* was present in small spots  
31 (likely individual endoderm cells), and *sox2* was observed in a striped pattern orthogonal to the long axis of  
32 each explant (Figure 3G, Figure S3A). Together these results demonstrate that Nodal signaling specifies a  
33 number of tissue types in discrete, spatially-organized domains and promotes C&E morphogenesis within  
34 isolated naïve blastoderm in a dose-dependent manner.

35

36

37

38



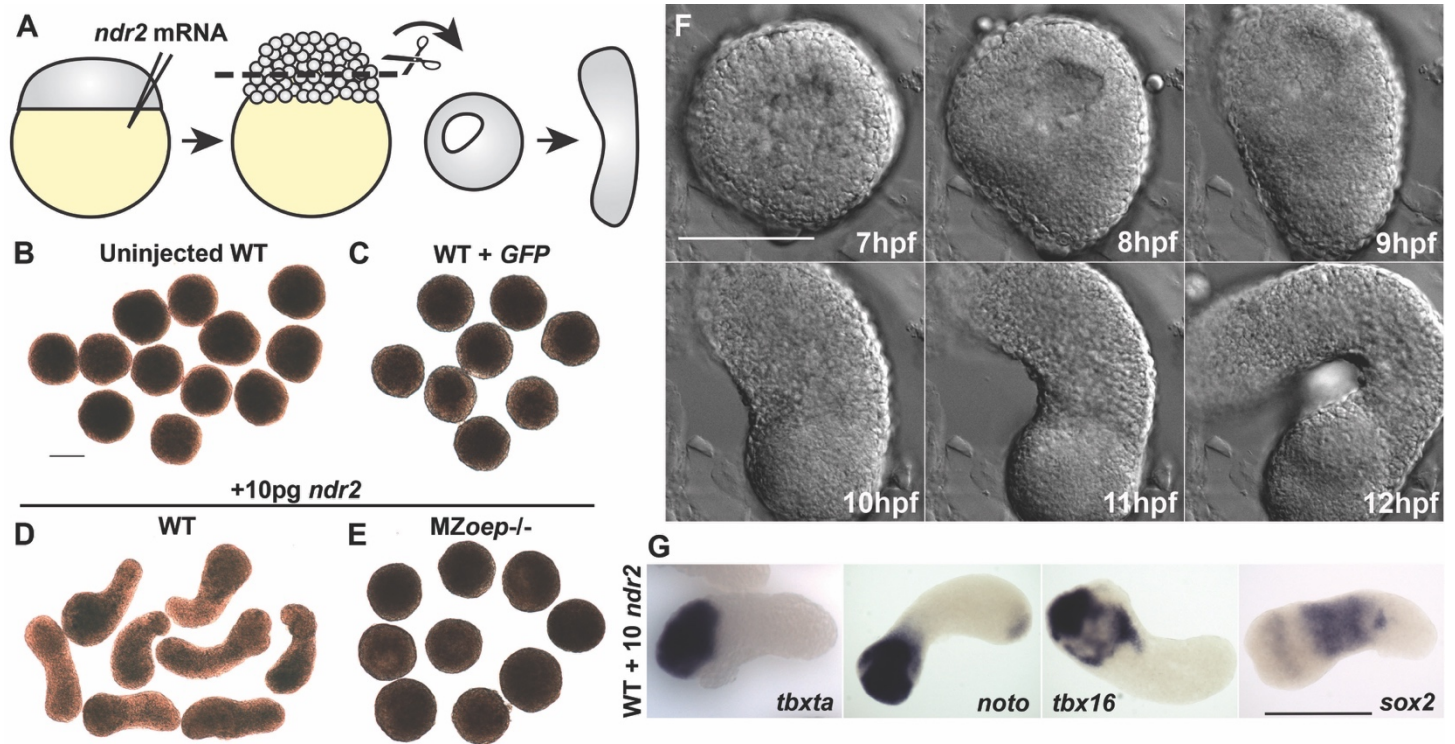

1  
2  
3  
4  
5  
6  
7  
8  
9  
10

**Figure 3: Nodal ligands promote ex vivo C&E of blastoderm explants**

**A)** Diagram of injection and explantation of zebrafish embryos. **B-E)** Representative bright field images of live blastoderm explants of the indicated conditions/genotypes at the equivalent of two to four somite stage. **F)** Time-lapse DIC series of a WT explant injected with 10pg *ndr2* RNA. **G)** In situ hybridization for the transcripts indicated in WT explants injected with 10pg *ndr2* RNA. Scale bars are 200µm.

## 1 **Blastoderm explants exhibit asymmetric Nodal signaling**

2 The gene expression patterns observed in *ndr2*-expressing explants revealed asymmetry along the axis of  
3 extension, which is known to be critical for C&E morphogenesis of *Xenopus* explants (Ninomiya et al., 2004).  
4 To test whether Nodal signaling activity could account for this asymmetry, we immuno-stained *ndr2*-injected  
5 and uninjected WT control explants for phosphorylated Smad2, an indicator of active Nodal signaling (Figure  
6 4A). We identified pSmad2<sup>+</sup> and pSmad2<sup>-</sup> nuclei within explants using automated spot detection and  
7 colocalization analysis (Figure 4A, see methods), then quantified their spatial distribution along the “axis” of  
8 each explant (Figure 4B-C). Comparing the distribution of Smad2<sup>+</sup> nuclei (Figure 4B-C, blue dots) to all nuclei  
9 (gray dots) within explants revealed significant asymmetry beginning at 6 hpf and increasing through 8 hpf in  
10 *ndr2*-injected explants ( $p < 0.0001$ , Mann-Whitney test), but very few pSmad2<sup>+</sup> nuclei that exhibited little to no  
11 asymmetric distribution in uninjected controls (Figure 4B-C). Notably, the timing of pSmad2 detection differed  
12 between *ndr2*-injected explants and intact WT embryos, where an appreciable pSmad2 signal was first seen  
13 around 5 hpf (Figure S4A). pSmad2 then persisted in explants until at least 8 hpf, whereas no signal was  
14 detected after 6 hpf in embryos (Figure S4A). No signal was detectable in embryos treated with the small  
15 molecule Nodal inhibitor SB505124 (DaCosta Byfield, Major, Laping, & Roberts, 2004)(Figure S4B-C),  
16 indicating that this antibody specifically detected Nodal signaling activity. Further evidence of asymmetric  
17 Nodal signaling within explants was provided by increasing levels and asymmetry of *lefty1* (*lft1*) expression, a  
18 negative feedback inhibitor and direct transcriptional target of Nodal signaling (Meno et al., 1999), in *ndr2*-  
19 expressing but not control explants (Figure 4D). These results demonstrate that injection of *ndr2* mRNA at one-  
20 cell stage produces extending explants with asymmetric Nodal signaling activity.

21

## 22 **Nodal signaling and PCP promote cell polarity underlying C&E ex vivo**

23 *Xenopus* animal cap explants exposed to asymmetric Activin signaling exhibit robust ML cell polarization and  
24 intercalation (Ninomiya et al., 2004). To analyze cell polarity underlying Nodal-driven C&E in our explants, we  
25 utilized fluorescent membrane labeling to quantify cell alignment in live *ndr2*-expressing explants (Figure 5A-  
26 C). In *GFP*-expressing control explants, cells were randomly oriented (Figure 5A,C median angle=44°) when  
27 intact sibling embryos reached 2-4S stage. This was in stark contrast to *ndr2*-expressing explants, whose  
28 extension was accompanied by robust ML alignment of cells, defined as orthogonal to the axis of extension  
29 (Figure 5A,C median angle=19°), demonstrating that Nodal signaling is sufficient to induce ML cell alignment  
30 underlying C&E morphogenesis in populations of otherwise naïve cells.

31 To ask whether Nodal-dependent *ex vivo* extension and ML cell alignment require PCP signaling, we  
32 generated explants from embryos co-injected with 10pg *ndr2* mRNA and *vangl2* MO. *Vangl2*-deficient explants  
33 exhibited overall length and length/width ratios that were significantly reduced compared with those expressing  
34 *ndr2* alone, but significantly higher than uninjected controls (Figure 5B,D-E). Live imaging of fluorescently-  
35 labeled cell membranes further revealed that ML cell alignment was reduced, but not entirely randomized in  
36 *vangl2* morphant explants compared with those expressing *ndr2* alone (Figure 5A,C median angle=26°).  
37 Because Nodal is necessary and sufficient for ML cell polarization *ex vivo*, and this polarity is reduced upon

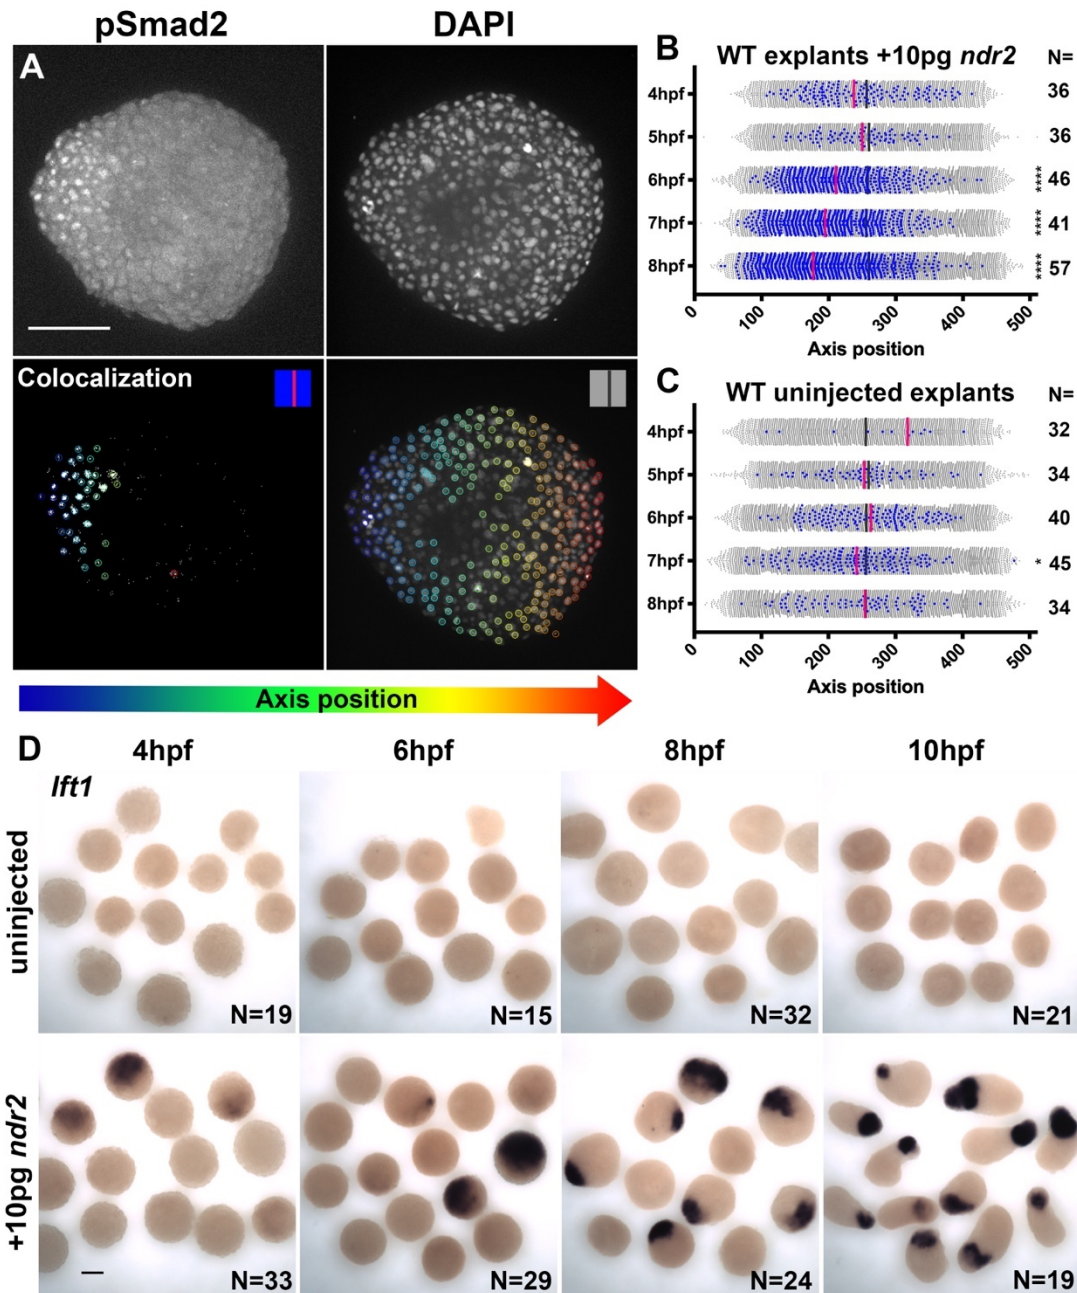

**Figure 4: Nodal-expressing explants exhibit asymmetric Nodal signaling activity**

**A**) Representative confocal z-projections and colocalization of immunofluorescent staining for phosphorylated Smad2 and DAPI-labeled nuclei in 8 hpf explants. Colored circles indicate automatically detected spots and are colored according to position along the axis of each explant. **B-C**) Axis position of pSmad2-positive nuclei (blue) and all nuclei (gray) in explants injected with 10pg *ndr2* (B) or un.injected (C) at the time points indicated. Each dot represents a single nucleus, pink and dark gray bars are median values. N= number of explants in each condition. Mann-Whitney tests to compare distribution of pSmad+ nuclei to all nuclei, \*\*\*\*p<0.0001, \*P<0.05. **D**) In situ hybridization for *lefty1* in un.injected (top) and *ndr2*-injected (bottom) explants at the time points indicated. Scale bars are 100µm.

1  
2  
3  
4  
5  
6  
7  
8  
9  
10  
11  
12  
13  
14

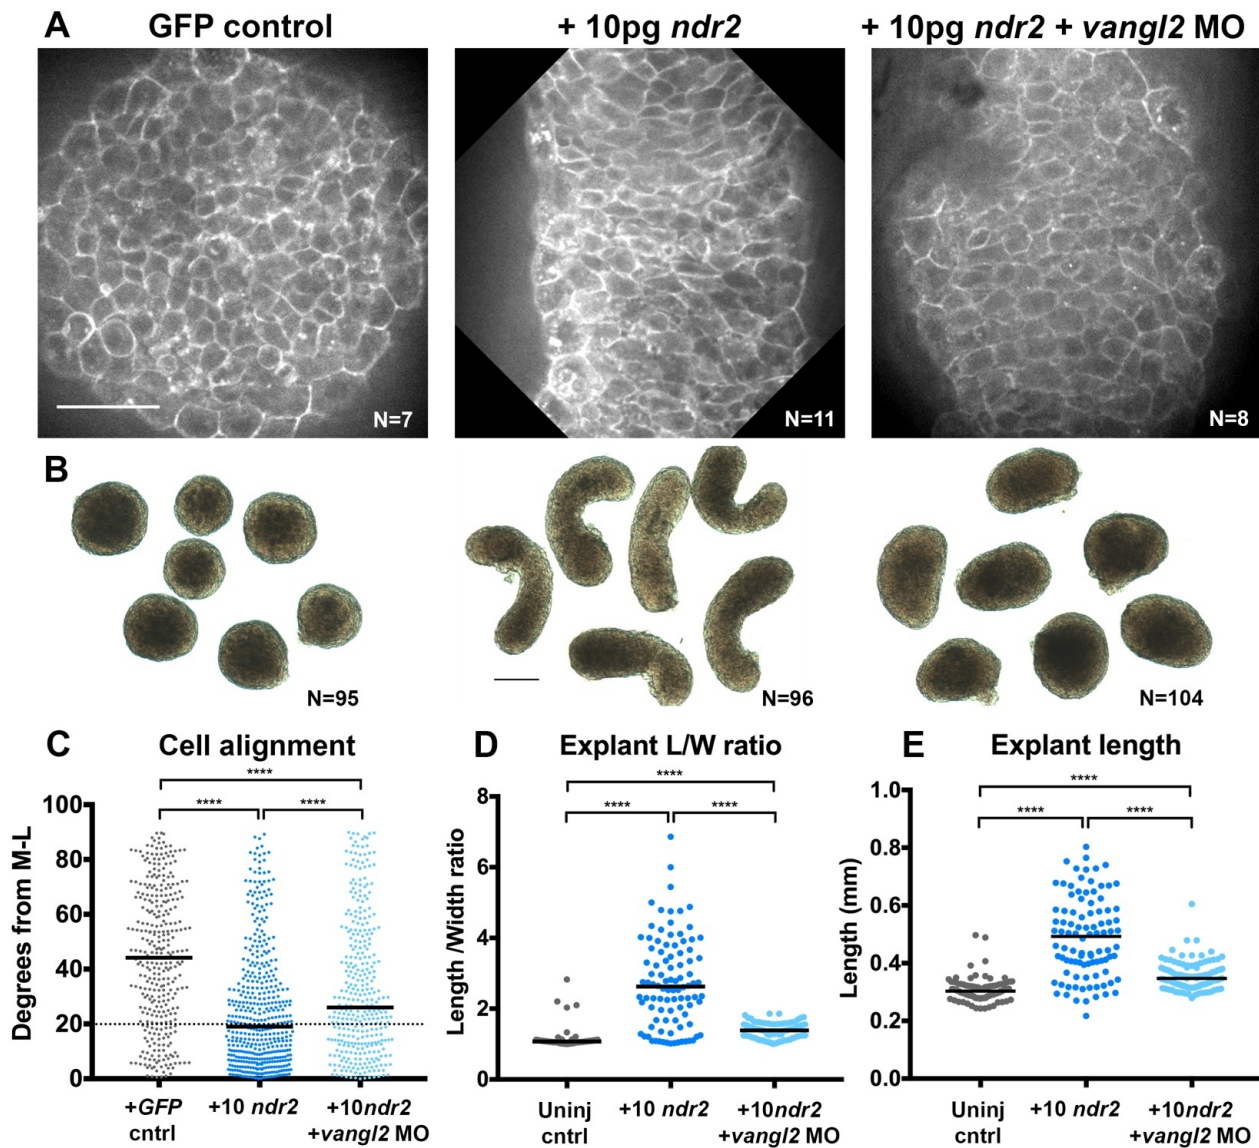

**Figure 5: Disrupted PCP reduces Nodal-induced cell polarization and C&E within explants**

**A)** Representative confocal micrographs of live membrane-labeled explants of the indicated conditions/genotypes at equivalent of 2-4 somite stage. **B)** Representative bright field images of live blastoderm explants at 2-4 somite stage. **C)** Explant cell alignment as in Figure 1. Number of explants in each condition is indicated on the corresponding panel in (A). Mediolateral (M-L) is defined as orthogonal to the axis of extension. **D-E)** Length/width ratios (D) and length (E) of explants depicted in (B). Each dot represents a single explant, black bars are median values. Number of explants in each condition is indicated on the corresponding panel in (B),  $p < 0.0001$  Kruskal-Wallis test. Scale bar is  $50\mu\text{m}$  in (A),  $200\mu\text{m}$  in (B).

1  
2  
3  
4  
5  
6  
7  
8  
9  
10  
11  
12  
13

1 disruption of PCP signaling, these results indicate that PCP signaling functions downstream of Nodal in explant  
2 extension. However, because *vangl2* MO reduces but does not completely abolish Nodal-induced C&E and ML  
3 cell alignment, our data are consistent with an additional PCP-independent role for Nodal signaling in C&E.

4

### 5 ***Nodal signaling promotes ex vivo C&E of neuroectoderm***

6 The localization of mesoderm tissue to one end of each *ndr2*-expressing explant (Figure 3) suggests that their  
7 extension is driven largely by non-mesodermal tissues. To directly observe mesoderm within explants as they  
8 extend, we performed live time-lapse confocal imaging of explants from *ndr2*-injected transgenic *lhx1a:gfp*  
9 embryos in which much of the axial and lateral mesoderm expresses GFP (Swanhart et al., 2010). Consistent  
10 with WISH in fixed explants (Figure 3), ~77% of live explants contained a mass of GFP+ cells at one end that  
11 was displaced as the GFP- region underwent extension (Figure 6A-B). This non-mesodermal portion of each  
12 explant expressed the neuroectoderm marker *sox2* by WISH (Figure 3G, Figure S3A), strongly implying that  
13 extension is driven by neuroectoderm.

14 To determine whether *ndr2*-expressing explants containing only mesoderm extend in the absence of  
15 neuroectoderm, we explanted Tg[*lhx1a:gfp*] embryos injected with a ten-fold higher dose (100pg) of *ndr2* that  
16 produced large amounts of mesoderm and endoderm but very little neuroectoderm (Figure 6A, Figure S3A).  
17 This high dose of *ndr2* converted nearly the entire explant into GFP+ mesoderm but yielded far fewer  
18 extending explants (~23%) (Figure 6A-B), further supporting our hypothesis that *ndr2*-induced *ex vivo*  
19 extension is largely neuroectoderm-driven. However, high doses of Nodal produce mesoderm that differs not  
20 only quantitatively (more mesoderm), but also qualitatively (different mesoderm) from that induced by lower  
21 doses. For example, 100 pg *ndr2* induced organizer tissue which exhibits little C&E *in vivo* (Ulrich et al., 2003)  
22 and expresses *gsc* (Figure S3A), which was shown to inhibit C&E (Ulmer et al., 2017). This raises the  
23 possibility that the lack of neuroectoderm alone may not account for the failure of these explants to extend.  
24 However, because even extension-prone mesoderm types induced by 10pg *ndr2* often fail to extend *ex vivo*  
25 (Figure 6A-B), these results are consistent with *ndr2* driving *ex vivo* extension largely through C&E of  
26 neuroectoderm.

27

### 28 ***ex vivo neuroectoderm C&E requires tissue-autonomous Nodal signaling***

29 Although mesoderm within *ndr2*-expressing explants does not often itself extend, it is possible that it produces  
30 secondary downstream signals that promote C&E of the adjacent neuroectoderm. To test whether Nodal  
31 signaling is required tissue-autonomously within the neuroectoderm for its extension, we constructed combined  
32 explants in which future 'mesodermal portions' consisting of Tg[*lhx1a:gfp*] blastoderm expressing high doses  
33 (100pg) of *ndr2* were combined with WT or *MZoepl*-/- future 'neuroectoderm portions' expressing only a  
34 fluorescent marker (RFP) (Figure 6C). As observed in single-origin explants expressing 10pg *ndr2*, many  
35 *ndr2*/WT combined explants (~27%) exhibited a mass of GFP+ mesoderm at the end of an extended stalk of  
36 RFP+ cells (Figure 6B,D), which were confirmed to express the neuroectoderm marker *sox2* by WISH (Figure  
37 S6.1). Critically, this contribution of neuroectoderm to *ex vivo* extension was Nodal-dependent, as *ndr2*/*MZoepl*

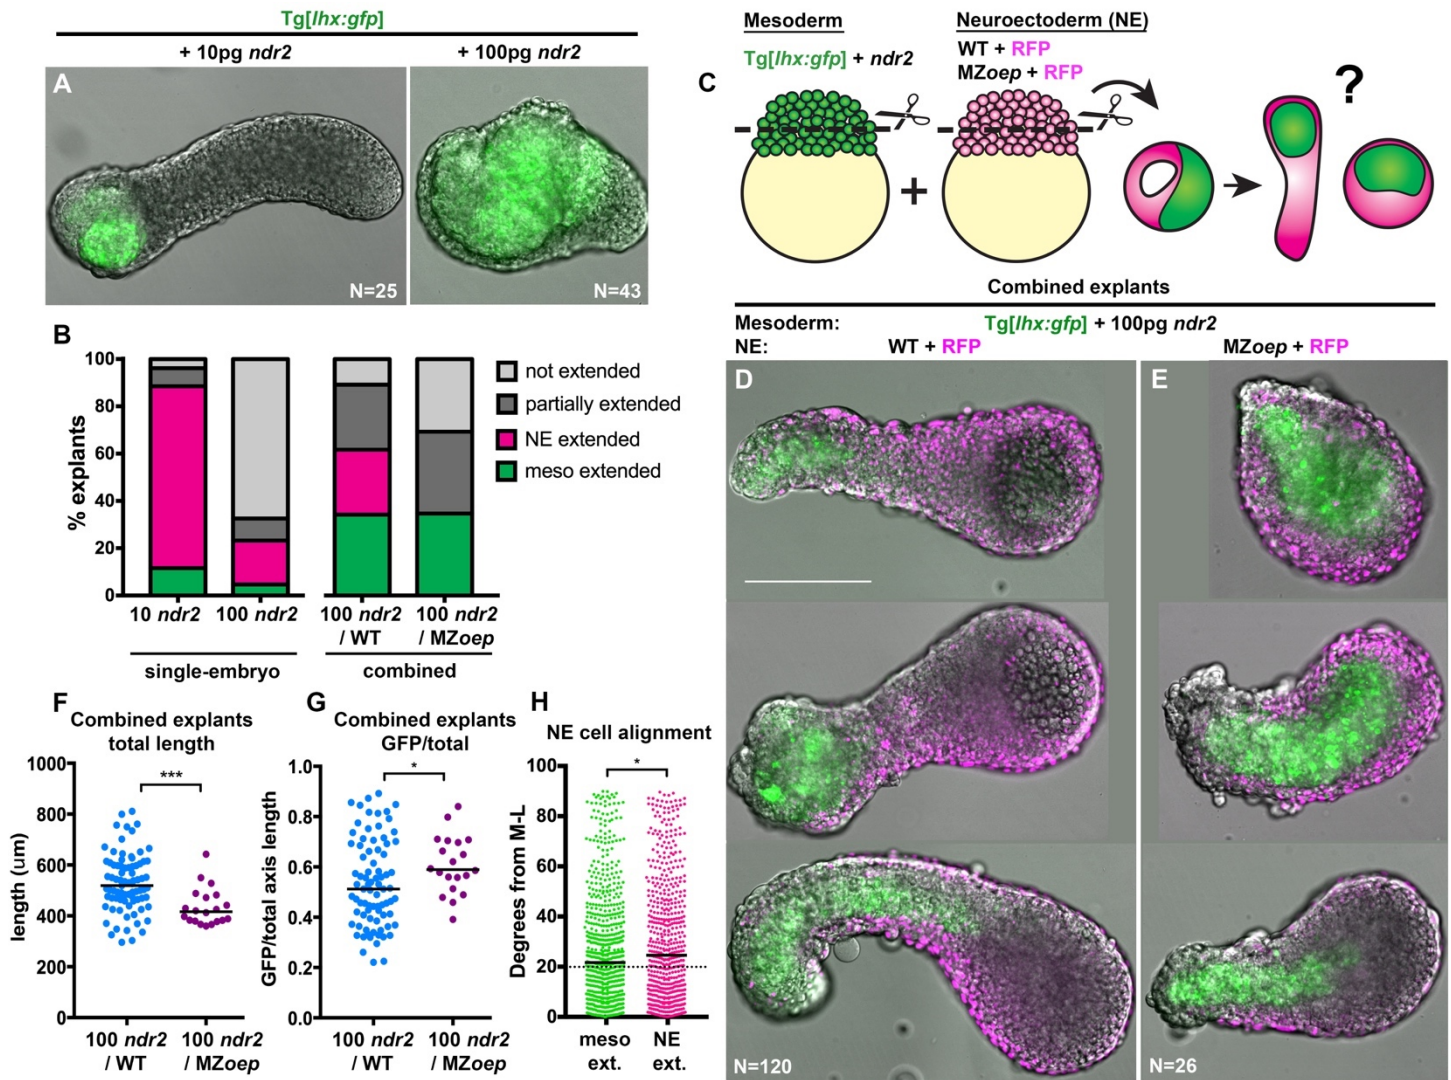

**Figure 6: Nodal signaling promotes ex vivo neuroectoderm C&E tissue-autonomously**  
**A)** Representative images of *Tg[lhx1a:gfp]* explants injected with 10 or 100pg *ndr2* RNA at the equivalent of 2-4 somite stage. **B)** Mode of extension in single-embryo (left) and combined (right) explants. Number of explants in each condition is indicated in the corresponding panels in (A,D,E). **C)** Diagram of procedure to generate combined explants. **D-E)** Representative images of 100*ndr2*/WT (D) and 100*ndr2*/MZoep (E) combined explants. Green is mesoderm labeled by *lhx1a:gfp*. **F-G)** Total length (F) or length of GFP+ region/total length (G) of combined explants depicted in (D-E). Each dot represents a single explant, black bars are median values, number of explants in each condition is indicated on the corresponding panel in (D-E). **H)** Neuroectoderm cell alignment (as in Figure 1) in 100*ndr2*/WT combined explants exhibiting mesoderm (left) or neuroectoderm (right)-driven extension. **p**=0.0002, **\***p=0.038, Mann-Whitney test. **\***p=0.013, K-S test. Scale bar is 200µm.

1  
2  
3  
4  
5  
6  
7  
8  
9  
10  
11  
12  
13  
14  
15  
16

1 combined explants never exhibited this configuration of extended neuroectoderm adjacent to an un-extended  
2 mass of mesoderm (Figure 6B,E). Furthermore, the total length of combined explants was significantly  
3 decreased in *ndr2/MZoep* combined explants compared with *ndr2/WT* ( $p=0.0002$ , Mann-Whitney test), while  
4 GFP+ mesoderm comprised a larger portion of their axial length ( $p=0.038$ , M-W test)(Figure 6F,G),  
5 demonstrating that GFP- neuroectoderm contributed little to extension of *ndr2/MZoep* combined explants.  
6 Surprisingly, an increased proportion (~34%) of combined explants exhibited robust extension of GFP+  
7 mesoderm (Figure 6B), and this increase was similar regardless of whether the neuroectoderm portion was  
8 WT or *MZoep*<sup>-/-</sup> (Figure 6B). Together these results demonstrate that *ex vivo* extension of zebrafish tissues  
9 can occur by one of two distinct modes of C&E: mesoderm- and/or neuroectoderm-driven. Moreover,  
10 neuroectoderm extension requires reception of Nodal signaling in a cell-autonomous manner.

11 Because the mesoderm portions of combined explants expressed a high dose of *ndr2* that rarely  
12 promoted mesoderm extension in single-embryo explants (Figure 6A-B), the observation of extended  
13 mesoderm within combined explants raises the possibility that neuroectoderm may promote C&E of  
14 neighboring mesoderm by acting as a 'sink' for the ligands produced within the mesoderm portion to promote a  
15 gradient of Nodal signaling. To test for this possibility, we stained for pSmad2 in 8 hpf 100 *ndr2/WT* combined  
16 explants and single-embryo explants injected with 10 or 100pg *ndr2*. Consistent with their robust extension and  
17 the results shown in Figure 4, 10pg *ndr2* explants exhibited spatial asymmetry of pSmad2+ nuclei and a  
18 gradient of pSmad2 staining intensity (Figure S6.2). Explants injected with 100pg *ndr2* exhibited increased  
19 pSmad2 staining intensity and reduced spatial asymmetry of pSmad2+ nuclei compared with 10pg explants,  
20 but staining intensity was still graded across the explant, with a slope very similar to that induced by 10pg *ndr2*  
21 (Figure S6.2). This indicates that although Nodal activity was detected throughout these explants, the level of  
22 signaling activity was still graded. As expected, combining these 100pg *ndr2* explants with an uninjected  
23 portion resulted in increased spatial asymmetry of pSmad2+ nuclei and reduced overall staining intensity  
24 (Figure S6.2). Surprisingly, however, this did not coincide with a steeper pSmad2 intensity gradient compared  
25 to single-embryo 10 or 100pg *ndr2* explants, as the slope of this correlation was similar in all three conditions  
26 (Figure S6.2). These results suggest that juxtaposition with uninjected WT blastoderm does not promote  
27 mesoderm extension by steepening the Nodal signaling gradient, but that it may do so by reducing overall  
28 Nodal levels within the entire explant, or through as yet unexplored mesoderm-neuroectoderm interactions.

29 We hypothesized that in instances of mesoderm-driven *ex vivo* C&E described above, the overlying  
30 neuroectoderm may extend passively along with the underlying mesoderm, which we would expect to stretch  
31 neuroectoderm cells along the axis of extension (AP) rather than aligning orthogonal to it (ML). To test this, we  
32 measured cell polarity within the neuroectoderm of combined WT explants exhibiting either mesoderm- or  
33 neuroectoderm-driven extension. Contrary to our expectations, neuroectoderm cells were actually more ML  
34 aligned in cases of mesoderm-driven C&E (Figure 6H), implying that neuroectoderm cells actively polarize  
35 regardless of which tissue drives extension. Together with our observation that combined explants containing  
36 Nodal-deficient neuroectoderm are significantly less extended than those with WT neuroectoderm (Figure 6F),

1 this supports the notion that Nodal-dependent C&E of the neuroectoderm actively contributes to *ex vivo* axis  
2 extension in both the presence and absence of mesoderm-driven C&E.

3

#### 4 ***Nodal signaling promotes C&E in the absence of mesoderm***

5 The results above demonstrate that the neuroectoderm contributes actively to *ex vivo* axis extension, for which  
6 Nodal signaling is required tissue-autonomously. However, because these explants contain a mesodermal  
7 component, it remains possible that mesoderm is required for C&E of the adjacent neuroectoderm. We  
8 therefore sought to create explants capable of receiving Nodal signals but lacking mesoderm by treating them  
9 with a time course of the Nodal inhibitor SB505124 (SB) (Figure 7A). Addition of 50 $\mu$ M SB to *ndr2*-expressing  
10 explants at 4, 5, or 6 hpf completely blocked both explant extension (Figure 7A-B) and expression of the  
11 mesoderm markers (and direct transcriptional targets of Nodal signaling, (Dubrulle et al., 2015)) *tbxta*, *noto*,  
12 and *tbx16* at 2-4S stage (Figure 7C). Because mesoderm marker expression was detectable by WISH in  
13 untreated *ndr2*-injected explants beginning at 5 hpf (Figure S7.1), these results imply that Nodal signaling is  
14 required for both specification and maintenance of mesodermal fates *ex vivo*. Explants treated with SB at 8 hpf  
15 (concurrent with C&E onset) underwent extension but were significantly shorter than DMSO-treated controls  
16 despite robust mesoderm marker expression (Figure 7B-C) ( $p < 0.0001$ , Mann-Whitney test). Notably, this  
17 differed from SB treatment of intact WT embryos, which did not disrupt mesoderm marker expression or AP  
18 axis extension after 5hpf (Figure S7.2)(Hagos & Dougan, 2007). Because loss of Nodal signaling prevented full  
19 explant extension even in the presence of mesoderm, these results further support a role for Nodal in *ex vivo*  
20 C&E, distinct from its role in mesoderm formation.

21 This experiment has not, however, allowed us to assess Nodal-dependent neuroectoderm extension in  
22 the absence of mesoderm. We therefore treated *ndr2*-expressing explants with SB in discrete two-hour  
23 windows followed by wash-out of the inhibitor (Figure 8A). Treatment from 4-6 hpf completely blocked  
24 mesoderm marker expression and extension, even after the drug was removed (Figure 8B-C). Treatment from  
25 6-8 hpf similarly blocked expression of mesoderm markers, but these explants exhibited marked (albeit  
26 reduced) extension (Figure 8B-C). Because sustained SB treatment beginning at 6 hpf completely blocked  
27 explant extension (Figure 7), this extension must be driven by Nodal signaling after removal of the inhibitor at 8  
28 hpf. Indeed, inhibiting only this later phase of Nodal signaling by SB treatment at 8hpf prevented full explant  
29 extension (Figures 7B, 8B), confirming that Nodal signaling after C&E onset contributes significantly to *ex vivo*  
30 extension morphogenesis.

31 Because explants treated with SB from 6-8 hpf exhibited Nodal-dependent extension but did not  
32 express mesoderm markers, we hypothesized that the observed extension was driven by neuroectoderm.  
33 Indeed, we found that explants treated with SB from 6-8 hpf exhibited dramatically increased expression of  
34 neuroectoderm markers *sox2* and *otx2b* by WISH compared with DMSO-treated controls (Figure 8C),  
35 demonstrating that Nodal signaling promotes C&E of neuroectoderm even in the absence of mesoderm.  
36 Expression of neuroectoderm markers was also detected in explants treated at 8hpf but was dramatically  
37 reduced or absent in those treated at 4-6 hpf, consistent with the previous finding that unmanipulated zebrafish



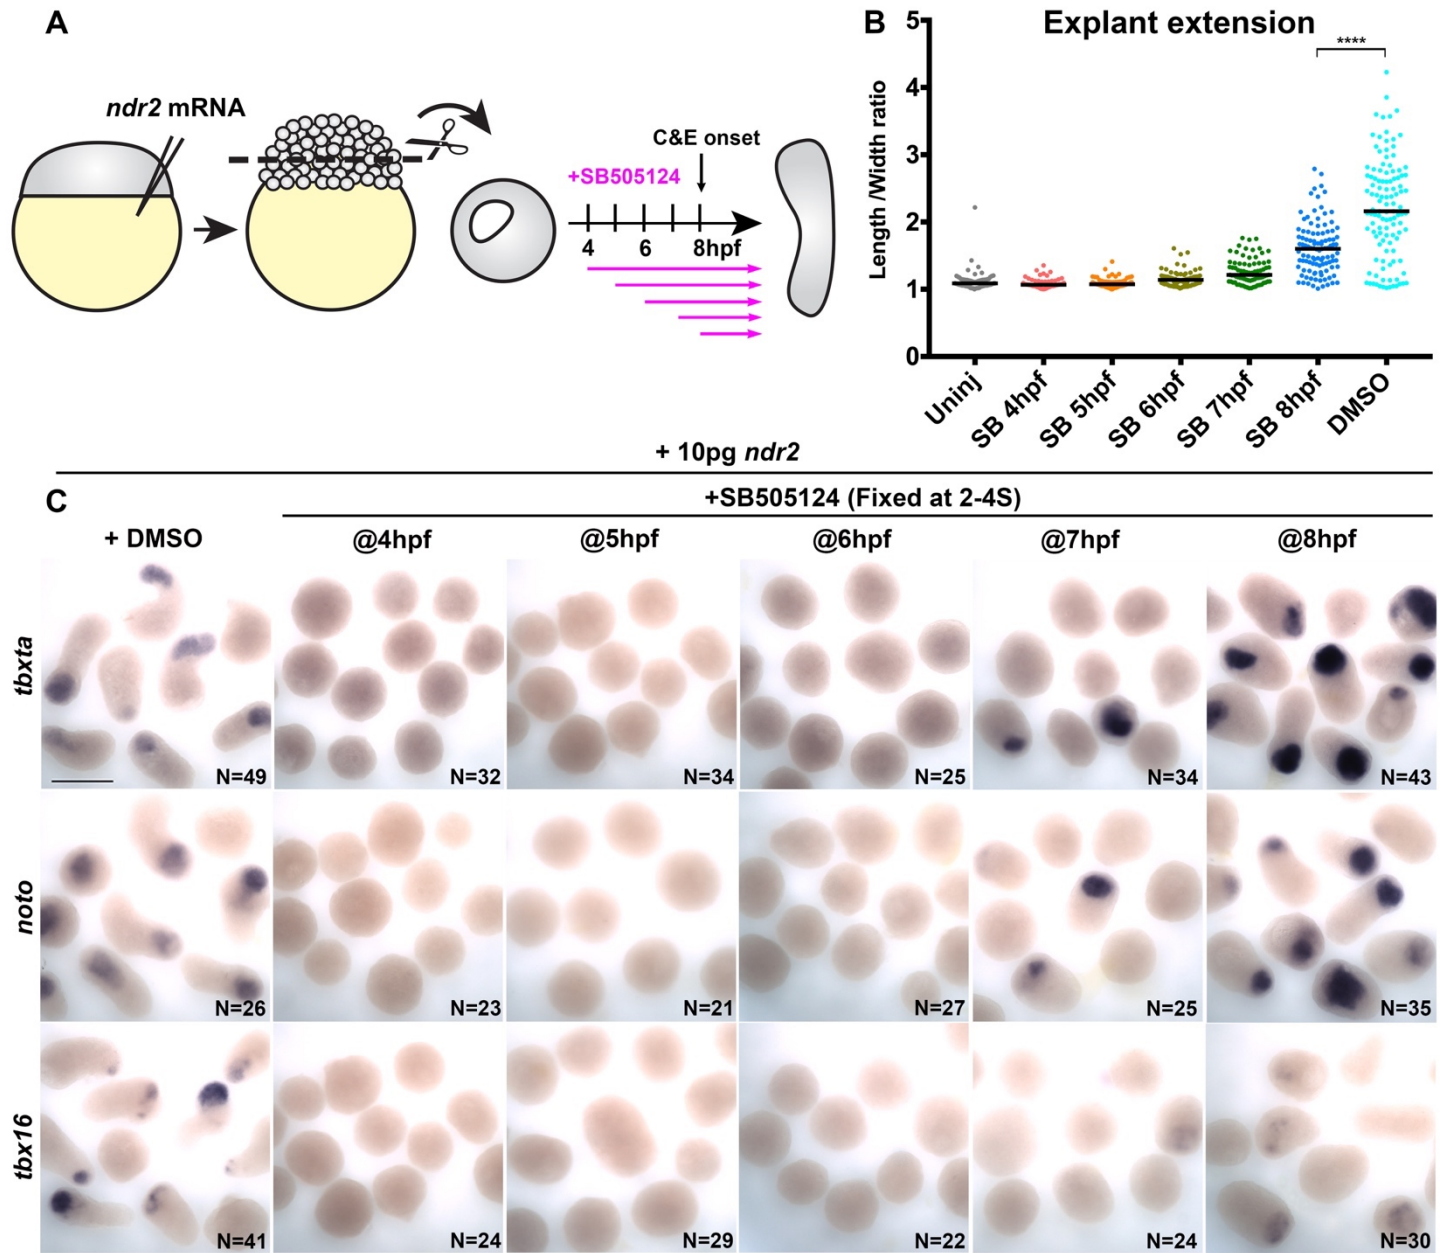

**Figure 7: Nodal inhibition after mesoderm formation prevents full explant extension**

**A**) Diagram of time course of SB505124 (SB) treatment of *ndr2*-injected explants. **B**) Length/width ratios of WT explants injected with 10pg *ndr2* RNA, treated with SB at the indicated time points, and fixed at the equivalent of 2-4 somite stage (depicted in (C)). Each dot represents a single explant, black bars are median values,  $p < 0.0001$ , Mann-Whitney test. **C**) In situ hybridization for the transcripts indicated in explants described in (B). Scale bar is 300 $\mu$ m.

1  
2  
3  
4  
5  
6  
7  
8  
9  
10

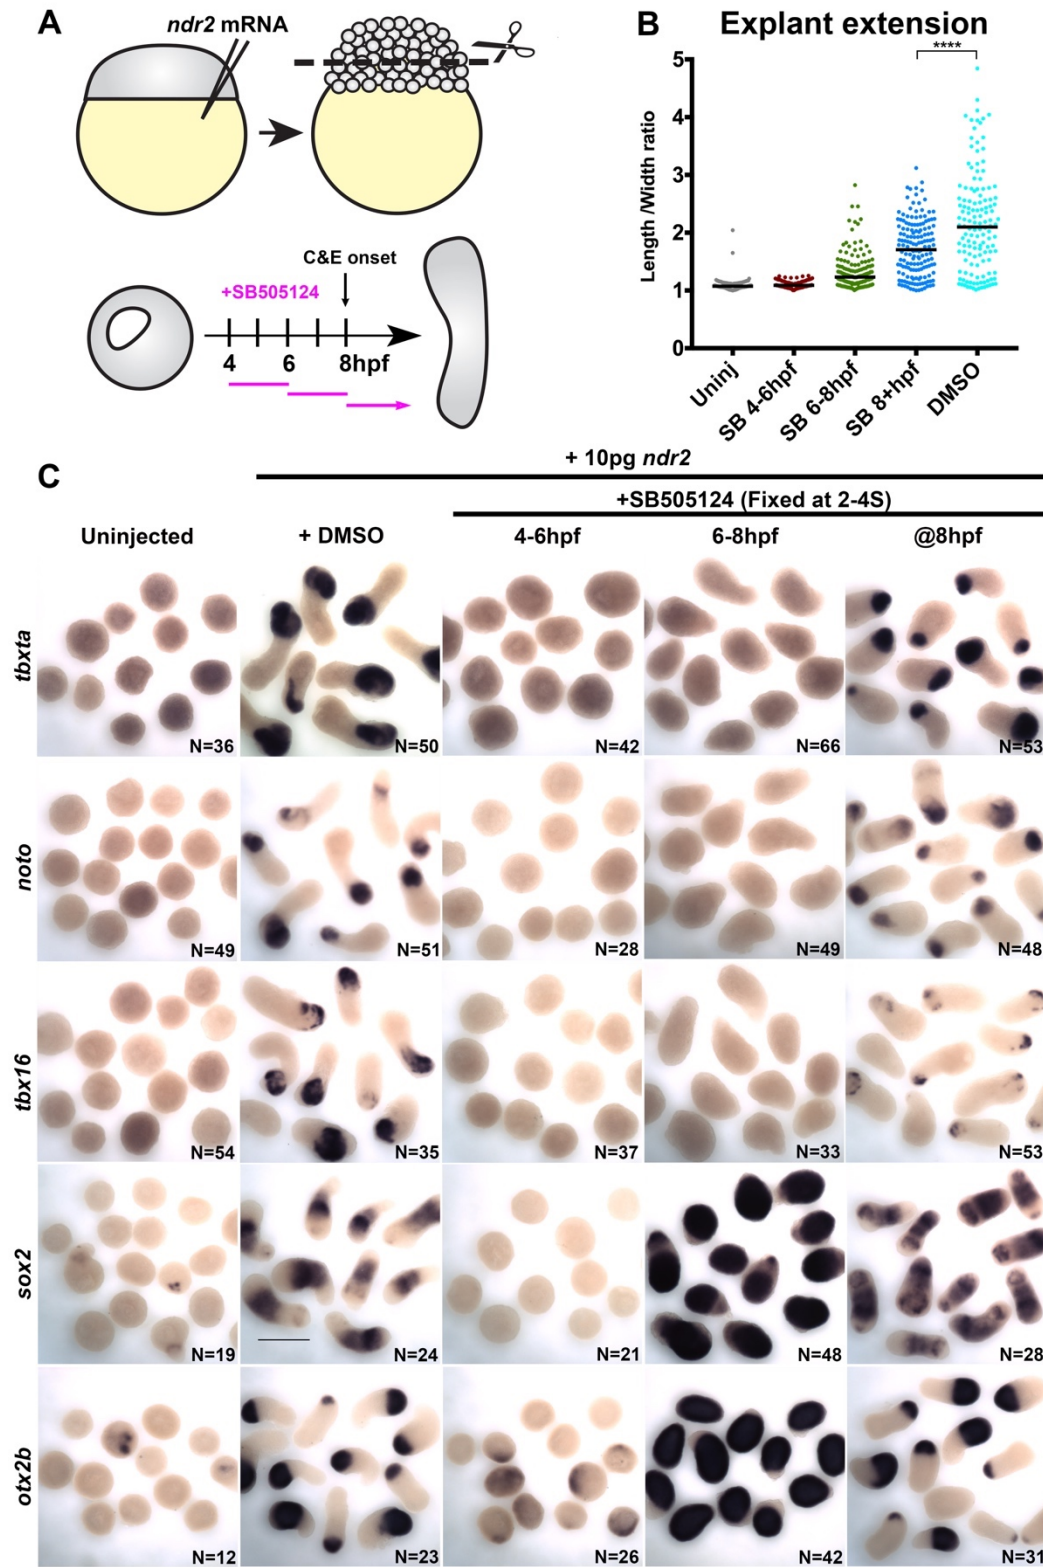

**Figure 8: Nodal promotes ex vivo neuroectoderm C&E in the absence of mesoderm**

**A)** Diagram of time course of SB treatment of *ndr2*-injected explants. **B)** Length/width ratios of WT explants injected with 10pg *ndr2* RNA, treated with SB at the indicated time points, and fixed at the equivalent of 2-4 somite stage (depicted in (C), as in Figure 7).  $p < 0.0001$ , Mann-Whitney test. **C)** In situ hybridization for the transcripts indicated in explants described in (B). Scale bar is 300 $\mu$ m.

1  
2  
3  
4  
5  
6  
7  
8  
9  
10

1 blastoderm explants differentiate into enveloping layer rather than neuroectoderm (Sagerström, Gammill,  
2 Veale, & Sive, 2005). Together these results provide evidence for a sustained requirement for Nodal signaling  
3 during *ex vivo* axis extension, including a late phase after C&E onset that promotes mesoderm-independent  
4 extension.

5

## 6 **DISCUSSION**

7 Coordination of embryonic patterning and morphogenesis is among the most fundamental and least  
8 understood questions in developmental biology. Convergence and extension (C&E) are evolutionarily  
9 conserved gastrulation movements that narrow germ layers mediolaterally and elongate them along the AP  
10 axis. AP axial patterning is necessary for C&E (Ninomiya et al., 2004), but how C&E movements are  
11 coordinated with embryonic patterning is only beginning to be understood. The noncanonical Wnt/PCP  
12 signaling network is thought to act as a molecular compass to mediate ML cell polarization (Gray et al., 2011).  
13 Links between PCP and morphogens that pattern the embryo have been identified in zebrafish gastrulae,  
14 including the ventral to dorsal gradient of BMP signaling that both specifies ventral cell fates (Nguyen et al.,  
15 1998) and prevents C&E movements in ventral regions of the gastrula in part by limiting expression of  
16 Wnt/PCP components (Myers, Sepich, & Solnica-Krezel, 2002) and regulating cell adhesion (von der Hardt et  
17 al., 2007). However, signals that orient the PCP compass to promote polarized C&E cell behaviors remain  
18 poorly defined. Here, using a combination of intact zebrafish gastrulae and an *ex vivo* model of axial extension,  
19 we have characterized a critical role for the morphogen Nodal in regulation of cell behaviors underlying  
20 embryonic axis extension. Although previous studies found that Nodal regulates neuroectoderm  
21 morphogenesis indirectly by specifying mesoderm (Aquilina-Beck et al., 2007; Araya et al., 2014; Gonsar et al.,  
22 2016), we have identified an additional mesoderm-independent role for Nodal signaling in promoting cell  
23 polarity and C&E morphogenesis within the neuroectoderm. Moreover, we find that Nodal-dependent  
24 neuroectoderm C&E contributes significantly to a simplified model of axis extension, demonstrating functional  
25 importance of both mesoderm-dependent and -independent Nodal function.

26 We provide several lines of evidence to support this role for Nodal signaling in tissue extension  
27 independent of mesoderm. First, ML polarization of Nodal-deficient neuroectoderm cells is not completely  
28 restored upon transplantation into WT hosts, demonstrating a cell-autonomous function (Figure 1). Second,  
29 exogenous Nodal ligands promote neuroectoderm extension in otherwise naïve blastoderm explants (Figure  
30 6). Third, Nodal signaling is required tissue-autonomously for this neuroectoderm extension (Figure 6). Finally,  
31 Nodal ligands are required for full explant extension even in the presence of mesoderm, and promote partial  
32 extension in the absence of mesoderm (Figures 7-8). Additional evidence demonstrates that this Nodal-  
33 dependent neuroectoderm C&E actively contributes to *ex vivo* axis extension. First, although combined  
34 explants containing WT mesoderm and Nodal-deficient neuroectoderm can extend by C&E of the mesoderm  
35 alone, they are significantly shorter than explants in which both the mesoderm and neuroectoderm extend  
36 (Figure 6). Then, even in cases of mesoderm extension, WT neuroectoderm cells become ML polarized,  
37 suggesting that they are actively intercalating. Our results also highlight the important role that mesoderm

1 plays in axis extension, however. For example, mesoderm in WT host embryos can partially, although not fully,  
2 restore ML polarity to transplanted Nodal-deficient neuroectoderm cells (Figure 1), and explants containing  
3 both mesoderm and neuroectoderm extend better than those containing neuroectoderm alone (Figure 8). The  
4 important role of vertical interactions between mesoderm and neuroectoderm in C&E has long been  
5 appreciated ((Elul & Keller, 2000; Elul, Koehl, & Keller, 1997; Ezin, Skoglund, & Keller, 2006), and we will be  
6 interested to examine how such interactions influence morphogenesis *ex vivo*, and whether this differs  
7 depending on the configuration of mesoderm (either vertically or in plane with the neuroectoderm) within our  
8 explants.

9 Previous work found that asymmetric Activin signaling is sufficient to promote C&E *ex vivo* (Ninomiya et  
10 al., 2004). We found that closely-related Nodal ligands are similarly sufficient for *ex vivo* extension, and  
11 furthermore, that Nodal pathway activation was asymmetric within our *ndr2*-expressing explants (Figure 4). At  
12 least two non-mutually exclusive hypotheses could explain how asymmetric Nodal signaling is translated into  
13 axis extension. First, Nodal could activate tissue-specific gene expression networks that both define tissue type  
14 and include instructions for C&E cell behaviors that are specific to each tissue. Alternatively, Nodal could  
15 promote differential expression of instructive signaling molecules along the axis of extension independent of  
16 the tissue types specified. This second possibility is supported by evidence that Nodal pathway ligands can  
17 induce extension at a number of different doses, irrespective of the tissue types produced (Figure S3), so long  
18 as that signaling is asymmetric (Ninomiya et al., 2004). Importantly, although we observe asymmetric Nodal  
19 signaling in extending explants, it is not yet clear that this asymmetry is required for extension.

20 As discussed above, non-canonical Wnt/PCP signaling is thought to act as a molecular compass that  
21 orients cells with respect to the embryonic axes (Gray et al., 2011). Because Nodal signaling is necessary for  
22 both AP axial patterning (Chen & Schier, 2001; Feldman et al., 2000; B. Thisse et al., 2000) and C&E cell  
23 behaviors (this work), it is a prime candidate to act upstream of PCP to orient this compass, thereby  
24 coordinating axial patterning and morphogenesis. Indeed, like others (Ninomiya et al., 2004), we found that  
25 Nodal-induced *ex vivo* C&E is reduced when PCP signaling is disrupted (Figure 5), suggesting that Nodal may  
26 regulate C&E through downstream PCP signaling. However, additional *in vivo* evidence suggests a more  
27 complicated interaction between these two signaling pathways. First, we found that transcripts encoding PCP  
28 signaling components are expressed normally within Nodal-deficient MZ*oep* mutant gastrulae (Figure 2),  
29 demonstrating that Nodal is unlikely to influence PCP via transcriptional regulation. We further found that  
30 localization of the core PCP component Prickle is only mildly affected in MZ*oep* mutants (Figure 2), suggesting  
31 that although Nodal is required for polarization of cell behaviors (Figure 1), it is not required for asymmetric  
32 distribution of this core PCP component. Finally, axis extension defects resulting from complete loss of Nodal  
33 signaling are exacerbated by disrupted PCP signaling (Figure 3), implying that PCP signaling retains some  
34 residual polarizing behavior in the absence of Nodal, just as Nodal retains some polarizing activity upon  
35 disruption of PCP (Figure 5). Taken together, these data demonstrate that PCP and Nodal each provide some  
36 function or cue that is necessary - but not sufficient - for full ML polarization of cells and cell behaviors  
37 underlying C&E, suggesting that they operate via partially parallel but cooperating pathways. This is also

1 consistent with our transplant results, in which cell-autonomous Nodal signaling was required for full planar  
2 polarization at the end of gastrulation, but an additional Nodal-independent mechanism was still functional  
3 during an earlier phase (Figure 1). Notably, results from our explants lead us to different conclusions regarding  
4 the relationship between Nodal and PCP. Within explants, Nodal ligands are sufficient to promote PCP-  
5 dependent cell polarization and C&E in the absence of other patterning cues (Figures 3,5), indicating that PCP-  
6 functions wholly downstream of Nodal signaling in this *ex vivo* context. C&E and cell polarization are not  
7 completely abolished in *ndr2*-expressing *vangl2* morphant explants, however, demonstrating that Nodal likely  
8 contributes to polarized cell behaviors through an additional PCP-independent mechanism.

9       The Nodal-expressing explants described in this study provide a robust, simplified model of axial  
10 extension in which a signaling molecule of interest – in this case, Nodal – can be studied independently of  
11 endogenous patterning and signaling events. Although this is a powerful tool, it is important to acknowledge  
12 the ways in which this system differs from intact embryos. First, we found that the period of detectable Nodal  
13 signaling activity was substantially earlier and shorter in embryos than explants, as observed by pSmad2  
14 immuno-staining and responses to SB treatment. Nodal inhibition through 7 hpf effectively blocked extension in  
15 explants, whereas extension of intact embryos was only reduced when treated at 5 hpf or earlier, consistent  
16 with longer and later Nodal signaling in explants. Second, because explants do not contain the full complement  
17 of molecular signals and tissue interactions present in intact embryos, the contribution of additional signals to  
18 C&E may be masked by the reliance of explant extension on Nodal alone. This is illustrated, for example, by  
19 the function of PCP in parallel with Nodal *in vivo* but strictly downstream of Nodal *ex vivo*. The absence of a  
20 yolk cell also dramatically alters the geometry of explanted tissues and removes signaling input from the  
21 extraembryonic yolk syncytial layer. Despite these differences, explants exhibit a suite of complex, biologically  
22 relevant behaviors in common with intact embryos, including C&E morphogenetic movements, ML cell  
23 polarization, timing of C&E onset, and transcriptional responses to Nodal. These explants, which we have  
24 dubbed “morphonoids”, therefore provide a simplified, synthetic platform that has allowed for new insights into  
25 the role of Nodal signaling in C&E morphogenesis.

26

## 27 **MATERIALS & METHODS**

### 28 **Zebrafish**

29 Adult zebrafish were raised and maintained according to established methods (Westerfield, 1993) in  
30 compliance with standards established by the Washington University Animal Care and Use Committee.  
31 Embryos were obtained from natural mating and staged according to morphology as described (Kimmel,  
32 Ballard, Kimmel, Ullmann, & Schilling, 1995). All studies on WT were carried out in AB\* backgrounds.  
33 Additional lines used include *oep*<sup>tz257</sup> (Hammerschmidt et al., 1996) and Tg[*lhx1a:gfp*] (Swanhart et al., 2010).  
34 *oep*<sup>-/-</sup> embryos were rescued by injection of 50pg synthetic *oep* RNA and raised to adulthood, then  
35 intercrossed to generate maternal-zygotic *oep*<sup>-/-</sup> embryos. Fish were chosen from their home tank to be  
36 crossed at random, and the resulting embryos were also chosen from the dish at random for injection and  
37 inclusion in experiments.

1

## 2 **Microinjection of synthetic RNA and morpholino oligonucleotides**

3 One-celled embryos were aligned within agarose troughs generated using custom-made plastic molds and  
4 injected with 1-3 pL volumes using pulled glass needles. Synthetic mRNAs for injection were made by *in vitro*  
5 transcription from linearized plasmid DNA templates using Invitrogen mMessage mMachine kits. Doses of RNA  
6 per embryo were as follows: 100pg *membrane Cherry*, 50pg *membrane eGFP*, 25pg *H2B-RFP*, 50pg *pk-gfp*,  
7 and 2.5-100pg *ndr2*. Injection of 2ng MO1-*tri/vangl2* (Williams et al., 2012) was carried out as for synthetic  
8 RNA.

9

## 10 **Immunofluorescent staining**

11 Embryos were stained for phosphorylated Smad2 as described in (van Boxtel et al., 2015). Briefly: embryos  
12 and explants were fixed overnight in 4% PFA, rinsed in PBT, and dehydrated to 100% methanol. Prior to  
13 staining, embryos were rehydrated into PBS, rinsed in PBS + 1% Triton X-100, and incubated in ice-cold  
14 acetone at -20°C for 20 minutes. Embryos/explants were then blocked in PBS+ 10% FBS and 1% Triton X-100  
15 and incubated overnight at 4°C with an anti-pSmad2/3 antibody (Cell Signaling #8828) at 1:1000 in block.  
16 Samples were rinsed in PBT/1% Triton X-100 and incubated with Alexa Fluor 488 anti-Rabbit IgG (Invitrogen)  
17 at 1:1000. Embryos were co-stained with 4',6-Diamidino-2-Phenylindole, Dihydrochloride (DAPI) and rinsed in  
18 PBS/1% Triton X-100 prior to mounting in 2% methylcellulose for confocal imaging.

19

## 20 **Whole mount in situ hybridization**

21 Antisense riboprobes were transcribed using NEB T7 or T3 RNA polymerase and labeled with digoxigenin  
22 (DIG) (Roche). Whole-mount *in situ* hybridization (WISH) was performed according to (C. Thisse & Thisse,  
23 2008). Briefly: Embryos were fixed overnight in 4% paraformaldehyde (PFA) in phosphate buffered saline  
24 (PBS), rinsed in PBS + 0.1% tween 20 (PBT), and dehydrated into methanol. Embryos were then rehydrated  
25 into PBT, incubated for at least two hours in hybridization solution with 50% formamide (in 0.75 M Sodium  
26 chloride, 75mM Sodium citrate, 0.1% tween 20, 50µg/mL Heparin (Sigma), and 200µg/mL tRNA) at 70°C, then  
27 hybridized overnight at 70°C with antisense probes diluted approximately 1ng/µl in hybridization solution.  
28 Embryos were washed gradually into 2X SSC buffer (0.3 M Sodium chloride, 30mM Sodium citrate), and then  
29 gradually from SSC to PBT. Embryos were blocked at room temperature for several hours in PBT with 2% goat  
30 serum and 2 mg/mL bovine serum albumin (BSA), then incubated overnight at 4°C with anti-DIG antibody  
31 (Roche #11093274910) at 1:5000 in block. Embryos were rinsed extensively in PBT, and then in staining  
32 buffer (PBT +100mM Tris pH 9.5, 50mM MgCl<sub>2</sub>, and 100mM NaCl) prior to staining with BM Purple solution  
33 (Roche).

34

## 35 **Blastoderm explants**

36 Embryos were injected with *ndr2* RNA (and MOs) at one-cell stage as described above and dechorionated  
37 using Pronase (Roche). At 256- to 512-cell stage, watchmaker's forceps were used to excise the animal

1 portion of each embryo in an agarose-coated dish filled with 3X Danieau solution. Explants were allowed to  
2 heal briefly, then transferred into agarose-coated 6-well plates containing explant medium - comprised of  
3 Dulbecco's modified eagle medium with nutrient mixture F-12 (Gibco DMEM/F12) containing 2.5mM L-  
4 Glutamine, 15mM HEPES, 3% newborn calf serum, and penicillin-streptomycin - and incubated at 28.5°C. For  
5 combined explants, the newly-excised blastoderm of two embryos were placed cut-side together and allowed  
6 to heal briefly in 3X Danieau before transferring to culture medium.

7

### 8 **Pharmacological treatments**

9 50 $\mu$ M SB505124 (Sigma #S4696) was added to the media of explants (and embryos) in agarose-coated 6-well  
10 plates at the times specified. For wash-out experiments, SB-containing medium was removed and explants  
11 were washed twice with 0.3x Danieau solution before replacement with fresh explant medium.

12

### 13 **Transplantation**

14 For cell autonomy and Pk-GFP transplants, host and donor embryos were injected with RNA encoding different  
15 fluorescent markers and/or Pk-GFP as described above and dechorionated using Pronase. Host and donor  
16 embryos were arranged within the wells of a custom-molded agarose plate at approximately sphere stage, and  
17 approximately 20-40 cells were transferred from donors to hosts using a fine-pulled glass capillary.

18

### 19 **Microscopy**

20 Live embryos/explants expressing fluorescent proteins were mounted in 0.75% low-melt agarose, and fixed  
21 embryos/explants subjected to immunofluorescent staining were mounted in 2% methylcellulose in glass-  
22 bottomed 35-mm petri dishes for imaging using a modified Olympus IX81 inverted spinning disc confocal  
23 microscope equipped with Voltran and Cobolt steady-state lasers and a Hamamatsu ImagEM EM CCD digital  
24 camera. For live time-lapse series, 60  $\mu$ m z-stacks with a 2 $\mu$ m step were collected every three to five minutes  
25 (depending on the experiment) for three hours using a 20 x or 40x dry objective lens for intact embryos and a  
26 20x objective for explants. Temperature was maintained at 28.5°C during imaging using a Live Cell Instrument  
27 stage heater. For immunostained embryos and explants, 100  $\mu$ m z-stacks with a 1 or 2 $\mu$ m step were collected  
28 using a 10x or 20x dry objective lens, depending on the experiment. Bright field and transmitted light images of  
29 live embryos and *in situ* hybridizations were collected using a Nikon AZ100 microscope.

30

### 31 **Image analysis**

32 ImageJ was used to visualize and manipulate all microscopy data sets. For cell shape measurements in live  
33 embryos, a single z-plane (in ubiquitously labeled embryos) or a projection of several z-planes (when  
34 measuring transplanted cells) through the neuroectoderm was chosen for each time point. To measure cell  
35 orientation and elongation, the anteroposterior axis in all embryo images was aligned prior to manual outlining  
36 of cells. A fit ellipse was used to measure orientation of each cell's major axis and its aspect ratio. To assess  
37 Pk-GFP localization, isolated donor cells expressing Pk-GFP were scored according to subcellular localization

1 of GFP signal. For cell tracking, Imaris software and the ImageJ TrackMate plugin were used to automatically  
2 detect and track labeled nuclei in the dorsal hemisphere of WT and MZ*oep* mutant gastrulae and to produce  
3 color-coded depictions of their trajectories. To measure spatial distribution of pSmad2 immunostaining in  
4 explants, maximum intensity z-projections were made from each confocal stack for both pSmad2 and DAPI  
5 channels. All images were oriented such that the highest apparent pSmad2 signal (if any) was to the left, and  
6 the ImageJ 'Colocalization' plugin was used to detect colocalization of pSmad2 and DAPI channels. Next, the  
7 TrackMate plugin was used to detect both colocalized and DAPI-alone spots, whose X locations were  
8 quantified. To measure length/width ratios of explants, we divided the length of a segmented line drawn along  
9 the midline of each explant (accounting for curvature) by the length of a perpendicular line spanning the width  
10 of the explant near its midpoint. To measure width of the neural plate in whole mount embryos, dorsal-view  
11 images were collected of each embryo, and a line was drawn from one side of the *dlx3b* expression domain to  
12 the other side at the level of the mid-hindbrain boundary marked by *fgf8* expression. Length measurements  
13 were made similarly by measuring from the anterior to posterior aspects of the *dlx3b* expression domain in  
14 lateral-view images. Images were coded and analyses were performed blinded to ensure unbiased  
15 measurements.

16

## 17 **Statistical analysis**

18 Graphpad Prism 7 software was used to perform statistical analyses and generate graphs of data collected  
19 from embryo and explant images. The statistical tests used varied as appropriate for each experiment and are  
20 described in the text and figure legends. Data were tested for normal distribution, and non-parametric tests  
21 (Mann-Whitney and Kolmogorov-Smirnov) were used for all non-normally distributed data. Normally distributed  
22 data with similar variance between groups were analyzed using parametric tests (T-tests and ANOVAs). All  
23 tests used were two-tailed.

24

## 25 **ACKNOWLEDGEMENTS**

26 We thank Dr. Alex Schier and lab members for generously sharing fish and reagents, and Drs. Diane Sepich,  
27 Ann Sutherland, Ray Keller, and Dave Shook for helpful discussions. This work was supported by National  
28 Institutes of Health awards K99HD091386 to MLKW and 1R35GM118179 to LSK.

29

## 30 **COMPETING INTERESTS**

31 The authors declare no competing or financial interests.

32

33

34

35

36

37

38



1  
2  
3  
4  
5  
6  
7  
8  
9  
10  
11  
12  
13  
14  
15  
16  
17  
18  
19  
20  
21  
22  
23  
24  
25  
26  
27  
28  
29  
30  
31  
32  
33  
34  
35  
36  
37  
38  
39  
40

## REFERENCES

- Aquilina-Beck, A., Ilagan, K., Liu, Q., & Liang, J. O. (2007). Nodal signaling is required for closure of the anterior neural tube in zebrafish. *BMC Dev Biol*, 7, 126. doi:10.1186/1471-213X-7-126
- Araya, C., Tawk, M., Girdler, G. C., Costa, M., Carmona-Fontaine, C., & Clarke, J. D. (2014). Mesoderm is required for coordinated cell movements within zebrafish neural plate in vivo. *Neural Dev*, 9, 9. doi:10.1186/1749-8104-9-9
- Bastock, R., Strutt, H., & Strutt, D. (2003). Strabismus is asymmetrically localised and binds to Prickle and Dishevelled during *Drosophila* planar polarity patterning. *Development*, 130(13), 3007-3014.
- Bisgrove, B. W., Su, Y. C., & Yost, H. J. (2017). Maternal Gdf3 is an obligatory cofactor in Nodal signaling for embryonic axis formation in zebrafish. *Elife*, 6. doi:10.7554/eLife.28534
- Chen, Y., & Schier, A. F. (2001). The zebrafish Nodal signal Squint functions as a morphogen. *Nature*, 411(6837), 607-610. doi:10.1038/35079121
- Ciruna, B., Jenny, A., Lee, D., Mlodzik, M., & Schier, A. F. (2006). Planar cell polarity signalling couples cell division and morphogenesis during neurulation. *Nature*, 439(7073), 220-224.
- Concha, M. L., & Adams, R. J. (1998). Oriented cell divisions and cellular morphogenesis in the zebrafish gastrula and neurula: a time-lapse analysis. *Development*, 125(6), 983-994.
- Conlon, F. L., Lyons, K. M., Takaesu, N., Barth, K. S., Kispert, A., Herrmann, B., & Robertson, E. J. (1994). A primary requirement for nodal in the formation and maintenance of the primitive streak in the mouse. *Development*, 120(7), 1919-1928.
- DaCosta Byfield, S., Major, C., Laping, N. J., & Roberts, A. B. (2004). SB-505124 is a selective inhibitor of transforming growth factor-beta type I receptors ALK4, ALK5, and ALK7. *Mol Pharmacol*, 65(3), 744-752. doi:10.1124/mol.65.3.744
- Davidson, L. A., & Keller, R. E. (1999). Neural tube closure in *Xenopus laevis* involves medial migration, directed protrusive activity, cell intercalation and convergent extension. *Development*, 126(20), 4547-4556.
- Dougan, S. T., Warga, R. M., Kane, D. A., Schier, A. F., & Talbot, W. S. (2003). The role of the zebrafish nodal-related genes squint and cyclops in patterning of mesendoderm. *Development*, 130(9), 1837-1851.
- Dubrulle, J., Jordan, B. M., Akhmetova, L., Farrell, J. A., Kim, S. H., Solnica-Krezel, L., & Schier, A. F. (2015). Response to Nodal morphogen gradient is determined by the kinetics of target gene induction. *Elife*, 4. doi:10.7554/eLife.05042
- Dyson, S., & Gurdon, J. B. (1998). The interpretation of position in a morphogen gradient as revealed by occupancy of activin receptors. *Cell*, 93(4), 557-568.
- Elul, T., & Keller, R. (2000). Monopolar protrusive activity: a new morphogenic cell behavior in the neural plate dependent on vertical interactions with the mesoderm in *Xenopus*. *Dev Biol*, 224(1), 3-19.
- Elul, T., Koehl, M. A., & Keller, R. (1997). Cellular mechanism underlying neural convergent extension in *Xenopus laevis* embryos. *Dev Biol*, 191(2), 243-258.

- 1 Ezin, A. M., Skoglund, P., & Keller, R. (2006). The presumptive floor plate (notoplate) induces behaviors  
2 associated with convergent extension in medial but not lateral neural plate cells of *Xenopus*. *Dev Biol*,  
3 *300*(2), 670-686.
- 4 Feldman, B., Dougan, S. T., Schier, A. F., & Talbot, W. S. (2000). Nodal-related signals establish  
5 mesendodermal fate and trunk neural identity in zebrafish. *Curr Biol*, *10*(9), 531-534.
- 6 Feldman, B., Gates, M. A., Egan, E. S., Dougan, S. T., Rennebeck, G., Sirotkin, H. I., . . . Talbot, W. S. (1998).  
7 Zebrafish organizer development and germ-layer formation require nodal-related signals. *Nature*,  
8 *395*(6698), 181-185. doi:10.1038/26013
- 9 Glickman, N. S., Kimmel, C. B., Jones, M. A., & Adams, R. J. (2003). Shaping the zebrafish notochord.  
10 *Development*, *130*(5), 873-887.
- 11 Gonsar, N., Coughlin, A., Clay-Wright, J. A., Borg, B. R., Kindt, L. M., & Liang, J. O. (2016). Temporal and  
12 spatial requirements for Nodal-induced anterior mesendoderm and mesoderm in anterior neurulation.  
13 *Genesis*, *54*(1), 3-18. doi:10.1002/dvg.22908
- 14 Gray, R. S., Roszko, I., & Solnica-Krezel, L. (2011). Planar cell polarity: coordinating morphogenetic cell  
15 behaviors with embryonic polarity. *Dev Cell*, *21*(1), 120-133. doi:10.1016/j.devcel.2011.06.011
- 16 Gritsman, K., Talbot, W. S., & Schier, A. F. (2000). Nodal signaling patterns the organizer. *Development*,  
17 *127*(5), 921-932.
- 18 Gritsman, K., Zhang, J., Cheng, S., Heckscher, E., Talbot, W. S., & Schier, A. F. (1999). The EGF-CFC protein  
19 one-eyed pinhead is essential for nodal signaling. *Cell*, *97*(1), 121-132.
- 20 Gurdon, J. B., Standley, H., Dyson, S., Butler, K., Langon, T., Ryan, K., . . . Zorn, A. (1999). Single cells can  
21 sense their position in a morphogen gradient. *Development*, *126*(23), 5309-5317.
- 22 Hagos, E. G., & Dougan, S. T. (2007). Time-dependent patterning of the mesoderm and endoderm by Nodal  
23 signals in zebrafish. *BMC Dev Biol*, *7*, 22. doi:10.1186/1471-213X-7-22
- 24 Hammerschmidt, M., Pelegri, F., Mullins, M. C., Kane, D. A., Brand, M., van Eeden, F. J., . . . Nüsslein-  
25 Volhard, C. (1996). Mutations affecting morphogenesis during gastrulation and tail formation in the  
26 zebrafish, *Danio rerio*. *Development*, *123*, 143-151.
- 27 Heisenberg, C. P., Tada, M., Rauch, G. J., Saude, L., Concha, M. L., Geisler, R., . . . Wilson, S. W. (2000).  
28 Silberblick/Wnt11 mediates convergent extension movements during zebrafish gastrulation. *Nature*,  
29 *405*(6782), 76-81.
- 30 Howard, J. E., & Smith, J. C. (1993). Analysis of gastrulation: different types of gastrulation movement are  
31 induced by different mesoderm-inducing factors in *Xenopus laevis*. *Mech Dev*, *43*(1), 37-48.
- 32 Irvine, K. D., & Wieschaus, E. (1994). Cell intercalation during *Drosophila* germband extension and its  
33 regulation by pair-rule segmentation genes. *Development*, *120*(4), 827-841.
- 34 Jessen, J. R., Topczewski, J., Bingham, S., Sepich, D. S., Marlow, F., Chandrasekhar, A., & Solnica-Krezel, L.  
35 (2002). Zebrafish trilobite identifies new roles for Strabismus in gastrulation and neuronal movements.  
36 *Nat Cell Biol*, *4*(8), 610-615.
- 37 Johansen, K. A., Iwaki, D. D., & Lengyel, J. A. (2003). Localized JAK/STAT signaling is required for oriented  
38 cell rearrangement in a tubular epithelium. *Development*, *130*(1), 135-145.
- 39 Keller, R., & Danilchik, M. (1988). Regional expression, pattern and timing of convergence and extension  
40 during gastrulation of *Xenopus laevis*. *Development*, *103*(1), 193-209.

- 1 Keller, R., Davidson, L., Edlund, A., Elul, T., Ezin, M., Shook, D., & Skoglund, P. (2000). Mechanisms of  
2 convergence and extension by cell intercalation. *Philos Trans R Soc Lond B Biol Sci*, 355(1399), 897-  
3 922.
- 4 Kilian, B., Mansukoski, H., Barbosa, F. C., Ulrich, F., Tada, M., & Heisenberg, C. P. (2003). The role of  
5 Ppt/Wnt5 in regulating cell shape and movement during zebrafish gastrulation. *Mech Dev*, 120(4), 467-  
6 476.
- 7 Kimmel, C. B., Ballard, W. W., Kimmel, S. R., Ullmann, B., & Schilling, T. F. (1995). Stages of embryonic  
8 development of the zebrafish. *Dev Dyn*, 203(3), 253-310. doi:10.1002/aja.1002030302
- 9 Li, Y., Rankin, S. A., Sinner, D., Kenny, A. P., Krieg, P. A., & Zorn, A. M. (2008). Sfrp5 coordinates foregut  
10 specification and morphogenesis by antagonizing both canonical and noncanonical Wnt11 signaling.  
11 *Genes Dev*, 22(21), 3050-3063. doi:10.1101/gad.1687308
- 12 Luxardi, G., Marchal, L., Thomé, V., & Kodjabachian, L. (2010). Distinct Xenopus Nodal ligands sequentially  
13 induce mesendoderm and control gastrulation movements in parallel to the Wnt/PCP pathway.  
14 *Development*, 137(3), 417-426. doi:10.1242/dev.039735
- 15 Meno, C., Gritsman, K., Ohishi, S., Ohfuji, Y., Heckscher, E., Mochida, K., . . . Hamada, H. (1999). Mouse  
16 Lefty2 and zebrafish antivin are feedback inhibitors of nodal signaling during vertebrate gastrulation.  
17 *Mol Cell*, 4(3), 287-298.
- 18 Montague, T. G., & Schier, A. F. (2017). Vg1-Nodal heterodimers are the endogenous inducers of  
19 mesendoderm. *Elife*, 6. doi:10.7554/eLife.28183
- 20 Myers, D. C., Sepich, D. S., & Solnica-Krezel, L. (2002). Bmp activity gradient regulates convergent extension  
21 during zebrafish gastrulation. *Dev Biol*, 243(1), 81-98. doi:10.1006/dbio.2001.0523
- 22 Nguyen, V. H., Schmid, B., Trout, J., Connors, S. A., Ekker, M., & Mullins, M. C. (1998). Ventral and lateral  
23 regions of the zebrafish gastrula, including the neural crest progenitors, are established by a  
24 bmp2b/swirl pathway of genes. *Dev Biol*, 199(1), 93-110. doi:10.1006/dbio.1998.8927
- 25 Ninomiya, H., Elinson, R. P., & Winklbauer, R. (2004). Antero-posterior tissue polarity links mesoderm  
26 convergent extension to axial patterning. *Nature*, 430(6997), 364-367. doi:10.1038/nature02620
- 27 Park, M., & Moon, R. T. (2002). The planar cell-polarity gene stbm regulates cell behaviour and cell fate in  
28 vertebrate embryos. *Nat Cell Biol*, 4(1), 20-25. doi:10.1038/ncb716
- 29 Paré, A. C., Vichas, A., Fincher, C. T., Mirman, Z., Farrell, D. L., Mainieri, A., & Zallen, J. A. (2014). A  
30 positional Toll receptor code directs convergent extension in Drosophila. *Nature*, 515(7528), 523-527.  
31 doi:10.1038/nature13953
- 32 Pauklin, S., & Vallier, L. (2015). Activin/Nodal signalling in stem cells. *Development*, 142(4), 607-619.  
33 doi:10.1242/dev.091769
- 34 Pelliccia, J. L., Jindal, G. A., & Burdine, R. D. (2017). Gdf3 is required for robust Nodal signaling during germ  
35 layer formation and left-right patterning. *Elife*, 6. doi:10.7554/eLife.28635
- 36 Roszko, I., S Sepich, D., Jessen, J. R., Chandrasekhar, A., & Solnica-Krezel, L. (2015). A dynamic intracellular  
37 distribution of Vangl2 accompanies cell polarization during zebrafish gastrulation. *Development*,  
38 142(14), 2508-2520. doi:10.1242/dev.119032
- 39 Sagerström, C. G., Gammill, L. S., Veale, R., & Sive, H. (2005). Specification of the enveloping layer and lack  
40 of autoneuralization in zebrafish embryonic explants. *Dev Dyn*, 232(1), 85-97. doi:10.1002/dvdy.20198

- 1 Sagerström, C. G., Grinblat, Y., & Sive, H. (1996). Anteroposterior patterning in the zebrafish, *Danio rerio*: an  
2 explant assay reveals inductive and suppressive cell interactions. *Development*, 122(6), 1873-1883.
- 3 Schier, A. F., & Shen, M. M. (2000). Nodal signalling in vertebrate development. *Nature*, 403(6768), 385-389.  
4 doi:10.1038/35000126
- 5 Shih, J., & Keller, R. (1992a). Cell motility driving mediolateral intercalation in explants of *Xenopus laevis*.  
6 *Development*, 116(4), 901-914.
- 7 Shih, J., & Keller, R. (1992b). Patterns of cell motility in the organizer and dorsal mesoderm of *Xenopus laevis*.  
8 *Development*, 116(4), 915-930.
- 9 Smutny, M., Ákos, Z., Grigolon, S., Shamipour, S., Ruprecht, V., Čapek, D., . . . Heisenberg, C. P. (2017).  
10 Friction forces position the neural anlage. *Nat Cell Biol*, 19(4), 306-317. doi:10.1038/ncb3492
- 11 Solnica-Krezel, L., Stemple, D. L., Mountcastle-Shah, E., Rangini, Z., Neuhauss, S. C., Malicki, J., . . . Driever,  
12 W. (1996). Mutations affecting cell fates and cellular rearrangements during gastrulation in zebrafish.  
13 *Development*, 123, 67-80.
- 14 Strutt, H., & Strutt, D. (2005). Long-range coordination of planar polarity in *Drosophila*. *Bioessays*, 27(12),  
15 1218-1227. doi:10.1002/bies.20318
- 16 Swanhart, L. M., Takahashi, N., Jackson, R. L., Gibson, G. A., Watkins, S. C., Dawid, I. B., & Hukriede, N. A.  
17 (2010). Characterization of an *lhx1a* transgenic reporter in zebrafish. *Int J Dev Biol*, 54(4), 731-736.  
18 doi:10.1387/ijdb.092969ls
- 19 Tada, M., & Smith, J. C. (2000). *Xwnt11* is a target of *Xenopus* Brachyury: regulation of gastrulation  
20 movements via Dishevelled, but not through the canonical Wnt pathway. *Development*, 127(10), 2227-  
21 2238.
- 22 Thisse, B., Wright, C. V., & Thisse, C. (2000). Activin- and Nodal-related factors control antero-posterior  
23 patterning of the zebrafish embryo. *Nature*, 403(6768), 425-428. doi:10.1038/35000200
- 24 Thisse, C., & Thisse, B. (2008). High-resolution in situ hybridization to whole-mount zebrafish embryos. *Nat*  
25 *Protoc*, 3(1), 59-69. doi:10.1038/nprot.2007.514
- 26 Topczewski, J., Sepich, D. S., Myers, D. C., Walker, C., Amores, A., Lele, Z., . . . Solnica-Krezel, L. (2001).  
27 The zebrafish glypican knypek controls cell polarity during gastrulation movements of convergent  
28 extension. *Dev Cell*, 1(2), 251-264. doi:S1534-5807(01)00005-3 [pii]
- 29 Ulmer, B., Tingler, M., Kurz, S., Maerker, M., Andre, P., Mönch, D., . . . Blum, M. (2017). A novel role of the  
30 organizer gene *Gooseoid* as an inhibitor of Wnt/PCP-mediated convergent extension in *Xenopus* and  
31 mouse. *Sci Rep*, 7, 43010. doi:10.1038/srep43010
- 32 Ulrich, F., Concha, M. L., Heid, P. J., Voss, E., Witzel, S., Roehl, H., . . . Heisenberg, C. P. (2003). *Slb/Wnt11*  
33 controls hypoblast cell migration and morphogenesis at the onset of zebrafish gastrulation.  
34 *Development*, 130(22), 5375-5384. doi:dev.00758 [pii]  
35 10.1242/dev.00758
- 36 van Boxtel, A. L., Chesebro, J. E., Heliot, C., Ramel, M. C., Stone, R. K., & Hill, C. S. (2015). A Temporal  
37 Window for Signal Activation Dictates the Dimensions of a Nodal Signaling Domain. *Dev Cell*, 35(2),  
38 175-185. doi:10.1016/j.devcel.2015.09.014
- 39 Vincent, S. D., Dunn, N. R., Hayashi, S., Norris, D. P., & Robertson, E. J. (2003). Cell fate decisions within the  
40 mouse organizer are governed by graded Nodal signals. *Genes Dev*, 17(13), 1646-1662.

- 1 Vinson, C. R., & Adler, P. N. (1987). Directional non-cell autonomy and the transmission of polarity information  
2 by the frizzled gene of *Drosophila*. *Nature*, 329(6139), 549-551.
- 3 von der Hardt, S., Bakkers, J., Inbal, A., Carvalho, L., Solnica-Krezel, L., Heisenberg, C. P., &  
4 Hammerschmidt, M. (2007). The Bmp gradient of the zebrafish gastrula guides migrating lateral cells by  
5 regulating cell-cell adhesion. *Curr Biol*, 17(6), 475-487. doi:10.1016/j.cub.2007.02.013
- 6 Wallingford, J. B., & Harland, R. M. (2002). Neural tube closure requires Dishevelled-dependent convergent  
7 extension of the midline. *Development*, 129(24), 5815-5825.
- 8 Wallingford, J. B., Rowing, B. A., Vogeli, K. M., Rothbacher, U., Fraser, S. E., & Harland, R. M. (2000).  
9 Dishevelled controls cell polarity during *Xenopus* gastrulation. *Nature*, 405(6782), 81-85.  
10 doi:10.1038/35011077
- 11 Wang, J., Hamblet, N. S., Mark, S., Dickinson, M. E., Brinkman, B. C., Segil, N., . . . Wynshaw-Boris, A. (2006).  
12 Dishevelled genes mediate a conserved mammalian PCP pathway to regulate convergent extension  
13 during neurulation. *Development*, 133(9), 1767-1778. doi:10.1242/dev.02347
- 14 Wang, Y., Guo, N., & Nathans, J. (2006). The role of Frizzled3 and Frizzled6 in neural tube closure and in the  
15 planar polarity of inner-ear sensory hair cells. *J Neurosci*, 26(8), 2147-2156.
- 16 Warga, R. M., & Kimmel, C. B. (1990). Cell movements during epiboly and gastrulation in zebrafish.  
17 *Development*, 108(4), 569-580.
- 18 Westerfield, M. (1993). *The zebrafish book. A guide for the laboratory use of zebrafish (Danio rerio)*: Univ. of  
19 Oregon Press.
- 20 Williams, B. B., Cantrell, V. A., Mundell, N. A., Bennett, A. C., Quick, R. E., & Jessen, J. R. (2012). VANGL2  
21 regulates membrane trafficking of MMP14 to control cell polarity and migration. *J Cell Sci*, 125(Pt 9),  
22 2141-2147. doi:10.1242/jcs.097964
- 23 Xu, P. F., Houssin, N., Ferri-Lagneau, K. F., Thisse, B., & Thisse, C. (2014). Construction of a vertebrate  
24 embryo from two opposing morphogen gradients. *Science*, 344(6179), 87-89.  
25 doi:10.1126/science.1248252
- 26 Ybot-Gonzalez, P., Savery, D., Gerrelli, D., Signore, M., Mitchell, C. E., Faux, C. H., . . . Copp, A. J. (2007).  
27 Convergent extension, planar-cell-polarity signalling and initiation of mouse neural tube closure.  
28 *Development*, 134(4), 789-799.
- 29 Yin, C., Ciruna, B., & Solnica-Krezel, L. (2009). Convergence and extension movements during vertebrate  
30 gastrulation. *Curr Top Dev Biol*, 89, 163-192. doi:10.1016/S0070-2153(09)89007-8
- 31 Yin, C., Kiskowski, M., Pouille, P. A., Farge, E., & Solnica-Krezel, L. (2008). Cooperation of polarized cell  
32 intercalations drives convergence and extension of presomitic mesoderm during zebrafish gastrulation.  
33 *J Cell Biol*, 180(1), 221-232.
- 34 Zallen, J. A., & Wieschaus, E. (2004). Patterned gene expression directs bipolar planar polarity in *Drosophila*.  
35 *Dev Cell*, 6(3), 343-355.

36  
37
